1 Geraniol Enhances Inhibitory Inputs to Paraventricular Thalamic Nucleus and  
2 Induces Sedation in Mice

3

4 Ling Xu<sup>1,6</sup>, Yan Wang<sup>1,6</sup>, Ya-Yue Yang<sup>2,6</sup>, Xiao-Xiao Hua<sup>3</sup>, Li-Xia Du<sup>2</sup>, Jian-Yu  
5 Zhu<sup>2</sup>, Li-Na Huang<sup>1</sup>, Fang Fang<sup>4</sup>, Ming-Zhe Liu<sup>5</sup>, Rui Zhang<sup>1</sup>, Jin-Bao Li<sup>1</sup>, Yan-  
6 Qing Wang<sup>2</sup>, Ling Zhang<sup>3</sup>, Wen-Li Mi<sup>2,\*</sup>, Di Mu<sup>1,7,\*</sup>

7

8 <sup>1</sup>Department of Anesthesiology, Shanghai General Hospital, Shanghai Jiao Tong  
9 University School of Medicine, Shanghai 201620, China

10 <sup>2</sup>Department of Integrative Medicine and Neurobiology, School of Basic Medical  
11 Science; Institutes of Integrative Medicine; Institutes of Brain Science, Shanghai  
12 Medical College, Fudan University, Shanghai 200032, China

13 <sup>3</sup>The First Rehabilitation Hospital of Shanghai, Tongji University School of  
14 Medicine, Shanghai 200090, China

15 <sup>4</sup>Department of Endocrinology, Shanghai General Hospital, Shanghai Jiao Tong  
16 University School of Medicine, Shanghai 201620, China

17 <sup>5</sup>Department of Respiratory, The First Affiliated Hospital of Guangzhou Medical  
18 University, Guangzhou 510120, China

19 <sup>6</sup>These authors contributed equally

20 <sup>7</sup>Lead Contact

21 \*Correspondence: wenlimi@fudan.edu.cn (W.-L.M.), damonmu@163.com or  
22 018501md@shgh.cn (D.M.)

23

24

25 **Abstract**

26 Geraniol (GE), a plant-derived acyclic monoterpene, shows a wide variety of  
27 beneficial effects. Notably, recent studies have reported the potential sedative  
28 effects of GE in fish and rats. However, the mechanisms of GE in sedation  
29 remain elusive. Here, we found that GE reduced locomotion, relieved  
30 pentylenetetrazol (PTZ)-induced seizures, altered the electroencephalogram  
31 (EEG), and facilitated general anesthesia in mice. Meanwhile, GE decreased c-  
32 Fos expression and suppressed the calcium activity in the paraventricular  
33 thalamic nucleus (PVT). Microinjection of GE into the PVT reduced locomotion  
34 and facilitated propofol-induced anesthesia. Furthermore, the electrophysiology  
35 results showed that GE-induced dramatic membrane hyperpolarization and  
36 suppressed the neuronal activity of PVT neurons, mainly by prolonging  
37 spontaneous inhibitory postsynaptic currents and inducing tonic inhibitory  
38 currents via GABA<sub>A</sub> receptors. Our study revealed that GE enhances inhibitory  
39 inputs to PVT neurons and induces sedation in mice. These findings provide a  
40 potential candidate for further development of sedatives and anesthetics.

41

42 **Keywords:** geraniol; sedation; paraventricular thalamic nucleus; tonic inhibition;  
43 GABA<sub>A</sub> receptors

44

45 **Graphic Summary**

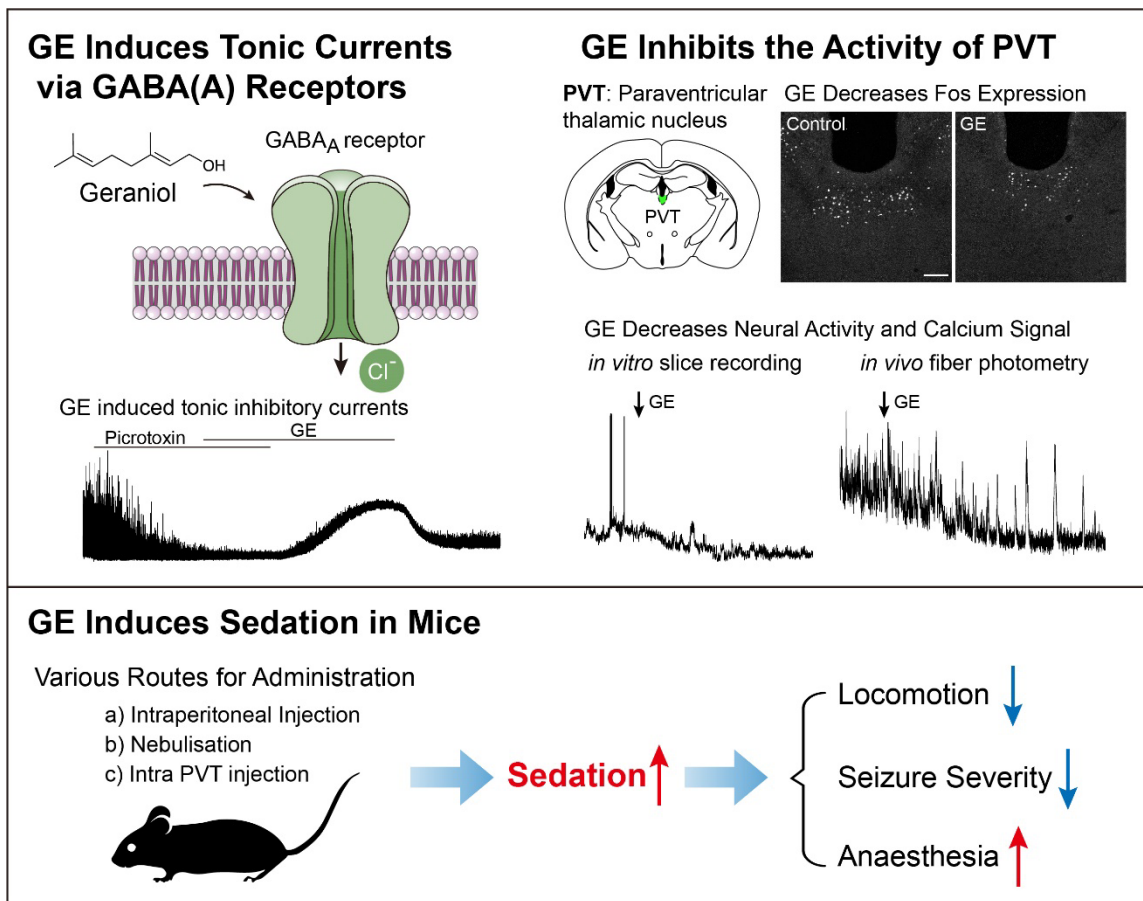

46

47

48

## 49 **Introduction**

50 Sedatives are depressants that reduce the irritability or excitement of the  
51 central nervous system. They are mainly used in surgical operations or intensive  
52 care units with analgesics and muscle relaxants to achieve the “triad of  
53 anesthesia” (Reade and Finfer, 2014). Sedation with propofol without intubation  
54 is widely used in both first and second-trimester surgical abortions in the  
55 outpatient setting (Dean et al., 2011). Moreover, there is an increasing need for  
56 sedation in pediatric patients (Coté and Wilson, 2019). Dissecting the  
57 mechanisms of sedation and developing novel sedatives have been the focus of  
58 sedation and anesthesia.

59 Plant extracts with sedative effects have long clinical experience in insomnia  
60 and epilepsy (Gaston and Szaflarski, 2018; Shi et al., 2016). Geraniol (GE; 3,7-  
61 dimethylocta-trans-2,6-dien-1-ol), an acyclic monoterpene, is abundant in  
62 essential oils extracted from lemongrass, rose, lavender, and other aromatic  
63 plants (Lapczynski et al., 2008; Pavan et al., 2018). It is classed as a safe flavor  
64 ingredient by the FDA and has an IFRA (International Fragrance Association)  
65 standard (Lapczynski et al., 2008). Reports showed that GE had anti-microbial,  
66 anti-inflammatory, anti-oxidant, anti-nociceptive, neuroprotective, and anti-cancer  
67 effects (Cho et al., 2016; Khan et al., 2013; La Rocca et al., 2017; Lv et al., 2017;  
68 Rekha et al., 2013; Thapa et al., 2012). Notably, it might also have sedative  
69 effects in fish and rats (Can et al., 2019; Medeiros et al., 2018). However, the  
70 underlying mechanisms of GE in sedation remain elusive, and the role of GE in  
71 these processes requires further dissection.

72 Sedatives have robust locomotor sedating effects (McOmish et al., 2012;  
73 Ralvenius et al., 2016) and anti-convulsant effects (Brohan and Goudra, 2017). A  
74 previous study found that GE could reduce locomotion and increased barbiturate-  
75 induced sleeping time in rats, reflecting the depressant effect of GE (Medeiros et  
76 al., 2018). Pentylenetetrazole (PTZ) is a central nervous system convulsant  
77 being thought to inhibit GABA<sub>A</sub>-mediated Cl<sup>-</sup> currents (Huang et al., 2001). A  
78 single injection of PTZ is a commonly used acute seizure model in mice (Li et al.,

79 2012; Van Erum et al., 2019). Whether GE could relieve the acute seizure in  
80 mice should be determined.

81 The corresponding brain regions and receptors involved in GE are currently  
82 unknown. A recent study found that the paraventricular thalamic nucleus (PVT) is  
83 a critical node for controlling wakefulness in mice (Ren et al., 2018). Activation of  
84 PVT neurons induces the transition from sleep to wakefulness. Conversely,  
85 suppression of the PVT neurons causes a reduction in wakefulness (Ren et al.,  
86 2018). Furthermore, previous studies have shown that GE might act on voltage-  
87 gated potassium channels (Ye et al., 2019) or calcium channels (El-Bassossy et  
88 al., 2016). A computational study revealed that the GABA<sub>A</sub> receptor  $\alpha$ 1 and  $\beta$ 1  
89 subunits might also be putative targets of GE (Zhang et al., 2019).

90 In the current study, we tested the hypothesis that GE plays a vital role in  
91 inducing sedation by multiple behavioral tests and EEG recordings. Next, we  
92 determined the mechanism of GE on PVT neurons by using calcium imaging,  
93 pharmacology, and brain slices electrophysiology. Our study revealed the  
94 sedative effects of GE via acting on the GABA<sub>A</sub> receptor in the PVT, providing a  
95 basis for further investigating essential oils' mechanisms and developing novel  
96 sedatives.

97

## 98 **Results**

### 99 **Geraniol reduces locomotion and relieves PTZ-induced seizures in mice**

100 Inhalation is an ideal administration route according to the bioavailability and  
101 therapeutic efficacy. First, we examine whether the nebulization of GE could  
102 suppress locomotion. We kept the mice in the induction chamber and nebulized  
103 GE (1.5% in ddH<sub>2</sub>O, 65 ml) for 40 minutes and then conducted the open field test  
104 (OFT, *Figure 1A*). The total distance and the move duration of GE-treated mice  
105 were significantly reduced compared with the ddH<sub>2</sub>O-treated mice (*Figure 1B-D*),  
106 while the velocity was unaffected (*Figure 1E*). Next, we intraperitoneally injected  
107 different doses of GE (100, 200, 400 mg/kg in corn oil) and performed the OFT  
108 (*Figure 1F*). Similarly, GE reduced the total distance and move duration dose-

109 dependently, without affecting the velocity (*Figure 1G-I, Figure 1-video 1*). These  
110 data confirm that GE has locomotor sedating effects in mice.

111 To further examine GE's anti-convulsant effect, we used pentylenetetrazol  
112 (PTZ)-induced acute seizures. Three groups of mice were intraperitoneally  
113 injected with corn oil, 100 mg/kg GE, or 200 mg/kg GE, respectively, and 55  
114 mg/kg PTZ 15 minutes later (*Figure 1J*). Behaviors were videotaped and  
115 manually scored from 0 (no abnormal behavior) to 5 (death) (Li et al., 2012; Van  
116 Erum et al., 2019). We found that the PTZ-induced seizure severity in the first 5  
117 minutes was dramatically decreased in GE-treated mice compared with corn oil-  
118 treated mice (*Figure 1K, Figure 1-video 2*). Moreover, we analyzed the average  
119 seizure score of 3-5 minutes after PTZ injection, the period with the most severe  
120 symptoms. We found that the seizure score in the 100 mg/kg GE group ( $1.9 \pm$   
121  $0.2$ ) was about two-thirds of that in the corn oil group ( $3.0 \pm 0.1$ ), while one-third  
122 for the 200 mg/kg GE group ( $1.3 \pm 0.2$ ) (*Figure 1L*). These results demonstrate  
123 that GE relieves the PTZ-induced seizures in mice, indicating the anti-convulsant  
124 effect of GE.

125 Next, we performed EEG recording and analyzed the power spectral density  
126 (PSD) for different frequency bandwidths. We recorded electroencephalogram  
127 (EEG) signals for 20 minutes for baseline and then intraperitoneally injected GE  
128 (200 mg/kg) or corn oil. Ten minutes later, EEG was recorded for another 20  
129 minutes. We found that GE significantly enhanced the PSD of delta waves (0.4-4  
130 Hz) and theta waves (4-7 Hz) (*Figure 2A-E*), while corn oil showed no apparent  
131 effect for all bandwidths (*Figure 2F-J*). These data indicate that GE enhances  
132 both delta and theta waves in mice.

133

### 134 **Geraniol facilitates general anesthesia**

135 We next examine whether GE could induce anesthesia. We nebulized GE or  
136 intraperitoneally injected GE (200 mg/kg or 400 mg/kg) and found that GE could  
137 not directly induce the loss of righting reflex in mice (data not shown). And then,  
138 we explore the potential role of GE in facilitating anesthesia. We first nebulized

139 GE for 40 minutes and then intravenously injected propofol (*Figure 3A*), and we  
140 recorded the time of loss of the righting reflex (LORR) and return of the righting  
141 reflex (RORR), which have been used as a surrogate measure for the loss and  
142 resumption of consciousness under anesthesia (Franks, 2008). We found that  
143 propofol (PRO, 20 mg/kg) led to a 100% LORR rate within 5 s in both GE and  
144 control groups. Nebulization of GE increased the propofol-induced RORR  
145 compared to the ddH<sub>2</sub>O (*Figure 3B*). Consistently, intraperitoneal injection of GE  
146 dose-dependently increased the propofol-induced RORR compared to corn oil  
147 (*Figure 3C-D*). To further determine whether GE could reduce propofol dosage to  
148 achieve the same RORR, we reduced the dose of propofol from 20 mg/kg to 15  
149 mg/kg. The RORR in the 200 mg/kg GE + 15 mg/kg PRO combination group was  
150 comparable to that in the corn oil + 20 mg/kg PRO group (*Figure 3E*), indicating  
151 that GE could reduce the dose of propofol for safe anesthesia.

152 We then examined the effect of GE in the general anesthesia induced by  
153 intraperitoneal injection of pentobarbital sodium or inhalation of isoflurane (*Figure*  
154 *3F-K*). The results showed that GE (200 mg/kg, i.p.) reduced the LORR and  
155 prolonged the RORR in pentobarbital sodium-induced anesthesia (*Figure 3F-H*).  
156 GE also decreased the LORR in 2% isoflurane induction and prolonged the  
157 RORR after 10 minutes of 1.5% isoflurane maintenance (*Figure 3I-K*). These  
158 data indicate that GE facilitates both intraperitoneal and inhalation anesthesia in  
159 mice.

160 One critical concern for the side effects of anesthetics is respiratory  
161 suppression. We examined the effects of GE (200 mg/kg, i.p.) on respiratory rate  
162 and peripheral capillary oxygen saturation (SpO<sub>2</sub>) when combined with propofol  
163 (20 mg/kg, i.v.)-induced anesthesia. We found that GE/propofol combination did  
164 not affect the respiratory rate and SpO<sub>2</sub> (*Figure 3-figure supplement 1A-B*),  
165 indicating that GE facilitates propofol anesthesia without respiratory suppression.  
166 Another concern of anesthesia is the potential impacts on learning and memory.  
167 We then adopted the Morris water maze (MWM) and fear conditioning (FC)  
168 paradigms. Three groups of mice were injected with corn oil (i.p., corn oil),

169 propofol (20 mg/kg, i.v., PRO), or GE with propofol (GE 200 mg/kg, i.p., propofol  
170 20 mg/kg, i.v., PRO+GE), respectively. Twenty-four hours later, the mice  
171 underwent training to find the platform for five successive days (Day 1-5, *Figure*  
172 *3-figure supplement 1C*). On day 6, the platform was removed, and all mice took  
173 the probe test (*Figure 3-figure supplement 1D*). We found that all groups showed  
174 similar spatial learning efficiency and memory performance. In the FC paradigm,  
175 the mice underwent FC training 24 hours after drug injection, and they showed  
176 similar freezing times in the five conditioning trials (*Figure 3-figure supplement*  
177 *1E*) and the following cue test (*Figure 3-figure supplement 1F*). These results  
178 illustrate that GE does not impair learning and memory in propofol-induced  
179 anesthesia of mice.

180

### 181 **PVT is a potential brain nucleus for GE's sedative effects**

182 To dissect the brain nucleus affected by GE, we first performed the c-Fos  
183 staining in the brain. The PVT is a critical wakefulness-controlling nucleus in the  
184 thalamus (Ren et al., 2018). We found that the c-Fos expression in the PVT was  
185 significantly decreased at 2 hours after GE treatment (200 mg/kg, i.p., *Figure 4A-*  
186 *C*), indicating that GE suppressed the PVT activity. We further performed *in vivo*  
187 fiber photometry to record the calcium signal of the PVT neurons. We injected  
188 the AAV-hSyn-GCaMP6s virus and implanted the optic fiber in the PVT (*Figure*  
189 *4D-E*). The results showed that the photobleaching was not significant during the  
190 20 minutes recording in the corn oil group. However, GE significantly decreased  
191 the calcium signal of the PVT (*Figure 4F-H*). These staining and *in vivo* calcium  
192 imaging results indicate that GE suppresses the activity of PVT.

193

### 194 **Microinjection of GE in PVT reduces locomotion and facilitates anesthesia**

195 To further investigate the role of PVT in GE-induced sedation, we implanted  
196 cannulas in the PVT and microinjected GE or artificial cerebrospinal fluid (ACSF)  
197 into the PVT (*Figure 5A*). First, we examined propofol-induced anesthesia after  
198 microinjection of GE (1 mM, 200 nl, *Figure 5B*, top) and found that GE markedly



199 prolonged the RORR (*Figure 5C*). Next, we used the open field test to examine  
200 the effect of PVT microinjection of GE in locomotion (*Figure 5B*, bottom).  
201 Consistent with the systemic administration, the results showed that total  
202 distance and move duration were decreased in the GE group compared to the  
203 ACSF group (*Figure 5D-F*), with the velocity unaffected (*Figure 5G*). These data  
204 demonstrated that microinjection of GE into the PVT facilitates propofol  
205 anesthesia and reduces locomotion.

206

### 207 **GE enhances inhibitory inputs to PVT neurons**

208 To examine GE's effects on PVT neurons, we performed the whole-cell  
209 current-clamp recording of PVT neurons (*Figure 6A*) and bath application of GE  
210 (*Figure 6B*). The 0.3 mM GE showed a tendency to hyperpolarize the membrane  
211 potential of PVT neurons (*Figure 6C*), and 1 mM GE markedly hyperpolarized the  
212 membrane potential (*Figure 6D*). Furthermore, 1 mM GE dramatically decreased  
213 the numbers of action potentials in depolarizing step-current injections compared  
214 with the corresponding baseline (*Figure 6E*). To better illustrate GE's effects, we  
215 displayed the activity of a representative neuron before and after 1 mM GE  
216 (*Figure 6F-I*). The neuron showed a typical action potential threshold in 50 pA  
217 depolarizing ramp-current and stable firing in 100 pA depolarizing step-current  
218 (*Figure 6F and H*). The membrane potential was significantly hyperpolarized  
219 (from  $-43$  mV to  $-63$  mV) and failed to generate an action potential in 200 pA  
220 depolarizing ramp-current and 100 pA depolarizing step-current pulses after GE  
221 application (*Figure 6G and I*). These results indicate that GE hyperpolarizes PVT  
222 neurons.

223 We further examined the detailed mechanisms of GE's effect on PVT  
224 neurons. The suppression of PVT neurons could be due to the suppression of  
225 excitatory inputs or the enhancement of inhibitory inputs. To test these  
226 possibilities, we performed whole-cell voltage-clamp recording for PVT neurons.  
227 First, we voltage-clamped the membrane potentials of PVT neurons at  $-70$  mV  
228 and observed the effect of 1 mM GE on spontaneous excitatory postsynaptic

229 currents (sEPSCs) in PVT neurons. Bath application of 1 mM GE slightly  
230 increased the frequency of sEPSCs (*Figure 7-figure supplement 1A*), but not the  
231 amplitude or half-width (*Figure 7-figure supplement 1B-C*). We also analyzed the  
232 holding currents at  $-70$  mV and found that GE did not affect the holding currents  
233 (*Figure 7-figure supplement 1D*). These results showed that GE did not affect  
234 the excitatory inputs of PVT neurons.

235 Next, we voltage-clamped the membrane potentials of PVT neurons at 0 mV  
236 and examined the GE's effect on spontaneous inhibitory postsynaptic currents  
237 (sIPSCs) in PVT neurons (*Figure 7A*). Bath application of 1 mM GE did not affect  
238 the sIPSCs frequency and amplitude (*Figure 7B-C*) but increased the half-widths  
239 (*Figure 7D*). Similar results were observed in the 0.1 mM GE and 0.3 mM GE  
240 group (*Figure 7-figure supplement 1E-J*), indicating sIPSCs duration was  
241 prolonged after GE application. It is worth noting that GE application increased  
242 the holding currents at 0 mV dose-dependently (*Figure 7E*), indicating that GE  
243 induces tonic currents. According to the  $\text{Cl}^-$  concentrations in the internal solution  
244 (4 mM) and the ACSF solution (136.5 mM), these current analysis results  
245 suggest that GE might induce tonic  $\text{Cl}^-$  influx in PVT neurons.

246

### 247 **GE induces tonic inhibition via GABA<sub>A</sub> receptors**

248 GABA<sub>A</sub> receptors are critical targets for various sedatives and anesthetics  
249 (Kim et al., 2020). A computational study revealed that the GABA<sub>A</sub> receptor  $\alpha 1$   
250 and  $\beta 1$  subunits might also be putative targets of GE (Zhang et al., 2019). We  
251 speculated that GE might induce tonic currents by acting on GABA<sub>A</sub> receptors.  
252 Picrotoxin (PTX) is an open channel blocker of GABA<sub>A</sub> receptors and blocks  
253 synaptic GABA<sub>A</sub> currents as well as tonic extrasynaptic currents (Włodarczyk et  
254 al., 2013). We applied picrotoxin (50  $\mu\text{M}$ ) before 1 mM GE and found that GE  
255 failed to induce tonic currents in the presence of picrotoxin. We further washed  
256 out picrotoxin and then observed the GE-induced tonic currents (*Figure 7F*). The  
257 statistical data showed that picrotoxin completely blocked the GE-induced  
258 holding current change (*Figure 7G*).

259 Gabazine (GBZ, also known as SR-95531) and bicuculline (BIC) are  
260 competitive GABA<sub>A</sub> receptor antagonists. Previous studies have found that  
261 gabazine did not prevent tonic inhibition, while bicuculline blocked tonic currents  
262 in hippocampal neurons and spinal dorsal horn neurons (Bai et al., 2001; Maeda  
263 et al., 2010; Wlodarczyk et al., 2013). We used gabazine and bicuculline to  
264 further investigate the potential mechanism of GE acting on GABA<sub>A</sub> receptors.  
265 First, we recorded PVT neurons and perfused them in 10 μM gabazine. We  
266 found that the sIPSCs were blocked while the holding current was unaffected.  
267 The application of GE still induced tonic currents remarkably in the presence of  
268 gabazine (*Figure 7H and J*). When 10 μM bicuculline was applied before GE, the  
269 GE-induced tonic currents were dramatically blocked, while washing out of  
270 bicuculline led to tonic currents (*Figure 7I and K*). These data indicate that GE-  
271 induced tonic inhibition is blocked by bicuculline but not gabazine. Taken  
272 together, these results demonstrated that GE induces tonic inhibition by acting on  
273 GABA<sub>A</sub> receptors.

274 It is reported that the binding of bicuculline further allosterically closed two β-  
275 α and one α-β interface as well as conferring rigid-body subunit transformation  
276 (Kim et al., 2020). We further used molecular docking and molecular simulations  
277 to study the interaction between GE and GABA<sub>A</sub>R subunits α1-6 and β1-3, and  
278 found that GABA<sub>A</sub>Rβ3 has the best binding energy (*Figure 7-figure supplement*  
279 *2A*). The optimal crystal structure of mouse GABA<sub>A</sub>Rβ3 fulfilled the probability  
280 density function energy requirements through the Ramachandran plot test  
281 (*Figure 7-figure supplement 2B*). The binding sites of GE to GABA<sub>A</sub>Rβ3 were  
282 revealed in *Figure 7-figure supplement 2C*. This precise match suggested that  
283 GE might interact with the GABA<sub>A</sub>Rβ3 activated pocket (Leu435). The molecular  
284 docking result informed that GE was a potential ligand for interacting with  
285 GABA<sub>A</sub>Rβ3.

286

287 **Discussion**

288 In this study, we found that GE had locomotor sedating, anti-convulsant, and  
289 hypnotic effects. Next, we observed that the systemic administration of GE  
290 suppressed the activity of the PVT. Microinjection of GE in the PVT could  
291 facilitate propofol-induced anesthesia and suppress locomotion. Furthermore, we  
292 found that GE induced dramatic membrane hyperpolarization and suppressed  
293 PVT neurons, mainly by prolonging the spontaneous inhibitory postsynaptic  
294 currents and inducing tonic inhibitory currents via GABA<sub>A</sub> receptors. In  
295 conclusion, we showed that GE plays a vital role in inducing sedation in mice.  
296 These findings provide a potential candidate for the development of sedatives  
297 and anesthetics.

298

### 299 **Dissection of GE's sedative effects by multiple behavioral tests**

300 Geraniol is abundant in the essential oils extracted from lemongrass, rose,  
301 lavender, and other aromatic plants, and it is widely used in the fragrance market  
302 due to its rose-like odor (Chen and Viljoen, 2010; Zhang et al., 2019). Recent  
303 studies found that GE treatment relieved pathological pain in mice (La Rocca et  
304 al., 2017; Lv et al., 2017). Additionally, several studies have shown that GE could  
305 modulate sedation in rodents or aquatic species (Can et al., 2019; Medeiros et al.,  
306 2018). They found GE could increase barbiturate-induced sleeping time in rats  
307 and conjectured that these effects were related to GE's depressant effect on the  
308 central nervous system (Medeiros et al., 2018). In our study, we adopted multiple  
309 behavioral tests to dissect the role of GE in sedation.

310 Inhaled therapies are the cornerstone of treatment in clinics, and  
311 aromatherapy has great market potentials. Inhalation is an ideal administration  
312 route for essential oils according to the bioavailability, toxicity, and therapeutic  
313 efficacy. Previous studies have used inhalation of a single component or complex  
314 of essential oils to study the sedative effects or anti-inflammatory effects in mice  
315 (Linck et al., 2009; Ueno-lio et al., 2014). Volatile anesthetics, such as  
316 sevoflurane and isoflurane, are ideal for direct vaporization. For sevoflurane, the  
317 boiling point is 58.5 °C, and vapor pressure is 193 mm Hg at 25 °C. The boiling

318 point is 48.5 °C, and vapor pressure is 330 mm Hg at 25 °C for isoflurane. GE is  
319 a low molecular weight monoterpenoid with liposolubility. However, the boiling  
320 point for GE is 227.5 °C, and vapor pressure is 0.03 mm Hg at 25 °C. So direct  
321 vaporization of GE by airflow is far less efficient than sevoflurane or isoflurane. In  
322 our experiments, we used ultrasonic nebulization equipment because it could  
323 control the GE concentration (1.5% in ddH<sub>2</sub>O) and nebulization rate (65 ml per 40  
324 minutes). Inhalation of GE suppressed the locomotion and facilitated propofol-  
325 induced anesthesia, indicating its locomotor sedating effect and hypnotic effect.  
326 Systemic administration of GE by intraperitoneal injection showed similar effects.  
327 These data were consistent with the previous study in rats (Medeiros et al.,  
328 2018). Since GE is recognized as a safe flavor ingredient by FDA, GE has both  
329 clinical and economic value in the future.

330 Another characteristic of sedatives is the anti-convulsant effect. Previous  
331 studies have shown that dehydrofukinone, isolated from *Nectandra grandiflora*  
332 (*Lauraceae*) essential oil, could delay the onset of generalized tonic-clonic  
333 seizures but did not alter the severity of seizures (Garlet et al., 2017). Here we  
334 found that GE significantly decreased the severity of seizures in the 3-5 minutes,  
335 which is the most severe period during the 15 minutes recording. These data  
336 indicate that GE has a robust anti-convulsant effect in mice. Moreover, we  
337 observed that GE groups (especially in the dose of 100 mg/kg) showed a slightly  
338 increased severity score after 5 minutes, which might be caused by the  
339 metabolized reduction of GE and the rebound of seizures. In the 200 mg/kg GE  
340 group, the rebound of seizures was not significant.

341 We also observed the hypnotic effect of GE by recording the LORR/RORR  
342 in different anesthetics models, including intravenous injection of propofol,  
343 intraperitoneal injection of pentobarbital sodium, and inhalation of isoflurane.  
344 Importantly, we found that the RORR in the 200 mg/kg GE + 15 mg/kg propofol  
345 group was comparable to the 20 mg/kg propofol group, indicating that GE could  
346 reduce the dosage of propofol. Multimodal general anesthesia is a modern  
347 management strategy. It is postulated that the use of more agents at smaller

348 doses could maximize desired effects while minimizing side effects (Brown et al.,  
349 2018). GE's hypnotic effect might be taken into consideration for choosing the  
350 drug combinations in the future.

351 We further evaluated the pattern of brain waves in GE-treated mice. The  
352 PSD of delta waves (0.5-4 Hz) and theta waves (4-7 Hz) were enhanced after  
353 GE injection, in accordance with the previous studies that GE could increase  
354 delta wave power in rats (Medeiros et al., 2018). Generally, the EEG is  
355 dominated by the delta and theta waves during the non-rapid eye movement  
356 (NREM) sleep (Scammell et al., 2017). Other studies showed increased delta  
357 waves and theta waves in multiple cortexes during the slow-wave sleep in rats  
358 (Jing et al., 2016). The EEG alterations indicate that GE has a hypnotic effect  
359 consistent with the LORR/RORR behavioral results.

360

### 361 **GE suppressed the PVT activity by enhancing inhibitory inputs via GABA<sub>A</sub>** 362 **receptors**

363 A recent study reported that the PVT is a critical node for controlling  
364 wakefulness in rodents (Ren et al., 2018). They found that activation of the PVT  
365 enhanced wakefulness, and suppression of the PVT reduced wakefulness. Here  
366 we observed that GE suppressed the activity of PVT from c-Fos staining results.  
367 Moreover, *in vivo* fiber photometry results showed that the calcium signal of the  
368 PVT was significantly decreased after GE. These data confirmed that GE could  
369 suppress the activity of PVT. Further microinjection of GE into the PVT facilitated  
370 propofol-induced anesthesia and reduced locomotion, indicating that the PVT is a  
371 crucial brain region responsible for GE's sedative effects.

372 The following whole-cell recording results showed that GE remarkably  
373 suppressed the activity of PVT neurons. The frequency of sEPSCs was slightly  
374 increased, while the amplitude or the half-width of sEPSCs was not affected. The  
375 increase in sEPSCs frequency might be caused by GE-induced disinhibition of  
376 presynaptic excitatory neurons. We speculated that further experiments with  
377 sodium channel blocker tetrodotoxin (TTX) should block action potentials and

378 eliminate the disynaptic effect. Meanwhile, the frequency and amplitude of  
379 sIPSCs were unaffected. Only the half-width was consistently increased,  
380 indicating a change in the kinetics of channel closing. This phenomenon is similar  
381 to the propofol-induced reduction in the decay rate of sIPSCs (Drexler et al.,  
382 2016; Orser et al., 1994). Recent studies have revealed that the PVT receives  
383 GABAergic inputs from many brain nuclei, including the reticular thalamic  
384 nucleus, zona incerta, and hypothalamic arcuate nucleus (Betley et al., 2013;  
385 Lee et al., 2019; Zhang and Van Den Pol, 2017). Whether GE facilitates  
386 inhibitory inputs from specific nuclei or enhances the overall GABAergic tone is  
387 still unknown.

388 Sedatives, such as propofol and midazolam, can induce tonic currents in  
389 hippocampal neurons or somatosensory cortex neurons (Bai et al., 2001;  
390 Yamada et al., 2007). The tonic inhibition has a profound influence on neural  
391 excitability, synaptic plasticity, neurogenesis, and network oscillations (Duveau et  
392 al., 2011; Ge et al., 2006; Martin et al., 2010; Pavlov et al., 2009). It is mainly  
393 induced by the activation of GABA<sub>A</sub> receptors distributed extrasynaptically, where  
394 they are exposed to fluctuating but low concentrations of GABA (Franks, 2008).  
395 Several studies have shown that tonic inhibition is mediated by constitutively  
396 active GABA<sub>A</sub> receptors in the absence of GABA (O'Neill and Sylantsev, 2018;  
397 Pavlov et al., 2009).

398 A previous study showed that bicuculline and gabazine acted as competitive  
399 GABA<sub>A</sub> receptor antagonists, but only bicuculline blocked tonic currents (Bai et  
400 al., 2001). Similarly, in our results, bicuculline blocked GE-induced sIPSCs and  
401 also tonic inhibition, while gabazine only blocked sIPSCs. A recent study  
402 revealed that cryo-electron microscopy structures of the  $\alpha 1\beta 2\gamma 2$  GABA<sub>A</sub> receptor  
403 bound to general anesthetics (Kim et al., 2020). The binding of bicuculline  
404 allosterically closes three of the anesthetic pockets, including two  $\beta$ - $\alpha$  interfaces  
405 and one  $\alpha$ - $\beta$  interface, as well as inducing rigid-body subunit transformations  
406 (Kim et al., 2020; Ueno et al., 1997). Another work using the GABA<sub>A</sub> receptor  
407 reported that the binding of bicuculline at the orthosteric sites prevents closure of

408 the  $\beta 3$ - $\alpha 1$  interfaces and rotation of the extracellular domains, and also stabilizes  
409 transmembrane domains in the closed state (Masiulis et al., 2019). We carried  
410 out molecular docking and molecular simulations to study the interaction between  
411 GE and GABA<sub>A</sub>R subunits  $\alpha 1$ -6 and  $\beta 1$ -3, and found that GABA<sub>A</sub>R $\beta 3$  has the  
412 best binding energy and Leu435 might be an interacted pocket. We conjecture  
413 that GE might bind to the  $\beta 3$  subunit (other binding sites are not excluded),  
414 inducing allosteric activation of GABA<sub>A</sub> receptors and tonic inhibition. These  
415 binding sites or the transformation change could be blocked by bicuculline but  
416 not gabazine.

417 The metabotropic GABA<sub>B</sub> receptor is a G protein-coupled receptor that  
418 mediates slow and prolonged inhibitory neurotransmission in the brain. The  
419 GABA<sub>B</sub> receptors require two distinct subunits (GABA<sub>B1</sub> and GABA<sub>B2</sub>) and locate  
420 both pre-synaptically and post-synaptically. They are coupled to K<sup>+</sup> and Ca<sup>2+</sup>  
421 channels, and the activation of GABA<sub>B</sub> receptors leads to a variety of effects,  
422 such as inhibition of transmitter release and neuronal hyperpolarization (Bowery,  
423 2006; Chalifoux and Carter, 2011). The ligand-binding mechanism and  
424 conformational change of GABA<sub>B</sub> receptors are different from those of GABA<sub>A</sub>  
425 receptors (Frangaj and Fan, 2018), and we cannot exclude the possible  
426 activation of GABA<sub>B</sub> receptors by GE. Furthermore, GE might also affect calcium  
427 and potassium channels, including voltage-dependent potassium ion channels  
428 (de Menezes-Filho et al., 2014; Ye et al., 2019). Further structure and mutation  
429 studies are needed to reveal the detailed mechanisms of these processes.

430 Consequently, our findings identify that GE enhances inhibitory inputs to  
431 PVT neurons, induces sedation in mice, and suggest a potential candidate for  
432 further development of sedatives and anesthetics. An attempt to use GE or  
433 combination GE with anesthetics in the clinic could be very promising.

434

## 435 **Materials and methods**

### 436 **Animals**



437 Postnatal days (P) 30 and 60 male *C57BL/6J* mice purchased from SLAC  
438 laboratory (Shanghai) were used for experiments. For slice recording  
439 experiments, P30 mice were used. All mice were raised on a 12-hour light/dark  
440 cycle (lights on at 7:00 am) with *ad libitum* food and water. All behavioral tests  
441 were carried out during the light phase. All animal experiment procedures were  
442 approved by the Animal Care and Use Committee of Shanghai General Hospital  
443 (2019AW008) and Animal Care and Use Committee of Fudan University School  
444 of Basic Medical Sciences (20180511-001).

#### 445 **Systemic administration of GE**

446 For nebulization of GE (Sigma, 163333), 1.5 ml GE was mixed with 100 ml  
447 ddH<sub>2</sub>O (vortex thoroughly). A nebulizer (yuwell, 402B) was used to control the  
448 nebulization rate (65 ml per 40 minutes). Mice were kept in a transparent  
449 plexiglass induction chamber (30 x 16 x 20 cm), and GE (1.5% in ddH<sub>2</sub>O, 65 ml)  
450 was nebulized for 40 minutes. Control mice were kept in the identical chamber  
451 with nebulized water (65 ml) for 40 minutes.

452 For intraperitoneal injection (i.p.), GE was diluted in corn oil (C805618,  
453 MACKLIN) by vortex thoroughly. Mice were intraperitoneally injected with GE  
454 (100, 200, or 400 mg/kg in weight, i.p.). For the control group, mice were  
455 intraperitoneally injected with the same volume of corn oil.

#### 456 **Implantation and microinjection in PVT**

457 Mice were anesthetized by vaporized isoflurane (induction, 2%; maintenance,  
458 1.5%) and head-fixed in a mouse stereotaxic apparatus (RWD Life Science Co.).  
459 A cannula (outside diameter 0.41 mm, internal diameter 0.25 mm; length 6 mm,  
460 RWD Life Science Co. ) was implanted into the PVT (AP -1.46 mm, ML 0 mm,  
461 DV -2.90 mm). Two weeks later, 200 nl of GE (1 mM in ACSF) or ACSF was  
462 microinjected into the PVT at a rate of 200 nl/min for 1 minute by standard  
463 infuse/withdraw pump (Harvard Apparatus). The injection needle was stayed for  
464 an additional 2 minutes to allow drug diffusion.

#### 465 **Open field test**

466 Mice were tested their locomotor activity in plexiglass enclosures (40 x 40 x 40  
467 cm). Fifteen minutes after GE injection (i.p., or microinjection to PVT), mice were  
468 placed in the center of the box and were videotaped individually for 10 minutes.  
469 The center area was defined as centric 20 x 20 cm. The track was analyzed by  
470 AniLab software (Ningbo AnLai). Total distance, move duration, and velocity  
471 were analyzed.

#### 472 **PTZ-induced Seizure**

473 PTZ (P6500, Sigma) was dissolved in saline at a concentration of 6 mg/ml. For  
474 the induction of seizures, PTZ was administered intraperitoneally at 55 mg/kg  
475 body weight. Animals were monitored for 15 minutes after the injection.  
476 Behavioral responses were recorded using a video camera and scored at every 1  
477 minute as follows: no abnormal behavior (0), reduced motility and prostate  
478 position (1), partial clonus (2), generalized clonus including extremities (3), tonic-  
479 clonic seizure with rigid paw extension (4) and death (5) (Li et al., 2012;  
480 Takahashi et al., 2012).

#### 481 **Propofol-induced general anesthesia**

482 Fifteen minutes after GE injection (i.p., or microinjection into PVT), the mice were  
483 anesthetized by propofol (20 mg/kg or 15 mg/kg, i.v.). The interval from propofol  
484 injection to loss of righting reflex (LORR) was measured as LORR time. The  
485 LORR of propofol-induced anesthesia is less than 5 seconds in our experiments.  
486 The interval from loss of right reflex to return of righting reflex (RORR) was  
487 measured as RORR time. Propofol was purchased from Beijing Fresenius Kabi  
488 Co., Ltd.

#### 489 **Pentobarbital sodium-induced general anesthesia**

490 Fifteen minutes after GE injection, the mice were anesthetized by pentobarbital  
491 sodium (50 mg/kg, i.p., Merck). And the LORR time and RORR time were  
492 measured.

#### 493 **Isoflurane-induced general anesthesia**

494 Isoflurane (RWD Life Science Co.) was delivered in 400 ml/min using an  
495 isoflurane vaporizer (MSS, UK) and an open-circuit rodent anaesthesia system.

496 Fifteen minutes after GE injection, mice were placed into induction chambers  
497 prefilled with 2 vol% isoflurane. The interval between when anesthetic  
498 administration was initiated and LORR time was then recorded. After LORR,  
499 isoflurane 1.5 vol% was continued for 10 minutes to ensure equilibration. Then,  
500 isoflurane administration was withdrawn, and the mice were considered to have  
501 recovered the righting reflex if they could turn themselves to the prone position.  
502 The interval between discontinuation of anesthetic and the return of righting  
503 reflex was determined as the time of RORR.

#### 504 **Morris water maze (MWM)**

505 MWM was carried out to assess spatial learning and memory function (Vorhees  
506 and Williams, 2006). The water maze was 120 cm cylindrical tank in diameter  
507 with a 10 cm platform in diameter, filled with opaque water obscuring the platform  
508 (water is 2 cm above the platform height). The platform was located in the center  
509 of one quadrant. Four visual cues were posted around the tank wall. An  
510 overhead camera and AniLab software (AniLab Tech, Ningbo, China) were used  
511 to track and analyzed the movement of animals, including latency, swimming  
512 distance, crossing number, and speed.

513 Twenty-four hours after corn oil (i.p.), propofol (20 mg/kg, i.v.), or propofol (20  
514 mg/kg, i.v.) with GE (200 mg/kg, i.p.) were injected, mice were trained for 5  
515 consecutive days (Day 1-5). During each acquisition day, mice had four trials  
516 (start from different quadrants, 30 minutes intervals). Mice were given 60  
517 seconds to find the platform and allowed to stay for 15 seconds. If a mouse could  
518 not find the platform within 60 seconds, it was gently guided to the platform and  
519 allowed to remain there for 15 seconds. On the probe trial on Day 6, mice had a  
520 60 seconds test for traveling in the tank without a platform.

#### 521 **Fear conditioning test**

522 Fear conditioning was conducted in a conditioning chamber (25 x 30 x 20 cm,  
523 ENV-008, Med Associates). The chamber was located in a sound-attenuating  
524 box (NIR-022MD, Med Associates). Electric footshock unconditioned stimulus  
525 (US) was produced by a shock generator (ENV-414S, Med Associates). Auditory

526 conditioned stimulus (CS) was produced by a speaker (ENV-224AM, Med  
527 Associates).

528 Twenty-four hours after the drugs were injected, mice were performed the  
529 fear conditioning test for three consecutive days (Day 1-3) (Shoji et al., 2014). On  
530 Day 1 (habituation), the mice were habituated to the fear condition chambers.  
531 After 2 minutes of exploration, three tones (75 dB, 4k Hz, 30 seconds duration)  
532 separated by a variable interval with a range of 60-120 seconds and an average  
533 of 90 seconds were delivered. On Day 2 (conditioning), mice received five trials  
534 of the CS paired with the US separated by 90 seconds. The CS was 75 dB, 4  
535 kHz, 30 seconds duration, co-terminated with a footshock US (0.6 mA, 1-second  
536 duration). After the last CS/US conditioning, the mice were kept in the  
537 conditioning chamber for another 60 seconds before being returned to the home  
538 cages. On Day 3, the mice were placed into a modified chamber to perform the  
539 tone cue test. The chamber was modified by replacing its metal floor with a  
540 plastic floor, adding a black triangular ceiling. Mice were placed in the altered  
541 chamber for 3 minutes to measure the freezing level in the altered context. Then,  
542 a tone (75 dB, 4 kHz) was delivered for 2 minutes.

543 The behavior of the mice was recorded and analyzed with the Video Freeze  
544 software (Med Associates, St Albans, VT). Motionless bouts lasting more than  
545 0.5 seconds were defined as freeze. On Day 1, the freezing percentages in the  
546 first 2 minutes exploration period and during the three tones were defined as the  
547 baseline freezing percentages to the environment and the tone. On Day 2, the  
548 freezing percentages in the first 29 seconds period during each tone (except the  
549 shock duration) were summarized as an indication of fear memory acquisition.  
550 On Day 3, the freezing percentages were calculated in the 2 minutes cue test.

### 551 **Electroencephalogram (EEG)**

552 Mice were anesthetized by vaporized isoflurane (induction, 2%; maintenance,  
553 1.5%) and head-fixed in a mouse stereotaxic apparatus. Erythromycin ointment  
554 was applied to the eyes of mice to avoid corneal drying. The scalp was shaved,  
555 and the skull was exposed under antiseptic conditions. Four copper screws were

556 installed at the 1 mm anterior to bregma and 1 mm anterior to the lambda with  
557 1.5 mm lateral on both sides of the skull without penetrating the underlying dura.  
558 Then the insulated wires from the EEG, reference, and ground electrodes were  
559 welded to the screws. The electrode apparatus was fixed on the skull using 3M  
560 tissue glue followed by dental cement.

561 The mice were placed in the behavior chamber for at least 30 minutes a day  
562 for 3 consecutive days before the experiment to ensure that the mice acclimate  
563 to the environment. The video camera was used to consecutively record the  
564 behaviors of the mice. The headstage and EEG electrodes were gently  
565 connected. The mice were adapted for 30 minutes and followed by a 10-minute  
566 baseline recording. Cortical EMG signal was recorded using a Zeus system  
567 (Zeus, Bio-Signal Technologies: McKinney, TX, USA), and LFP signals were  
568 filtered online at 200 Hz (3 kHz sampling rate). Then the mice were injected  
569 intraperitoneally with corn oil or geraniol, and the EEG signal was recorded  
570 lasting for 30 minutes.

571 Welch's averaged periodogram method with a 1024 ms nonoverlapping  
572 Hanning window (Nonuniform fast Fourier transform, NFFT = 2048) was used to  
573 perform a power spectral density analysis on local field potential (LFP) signals. A  
574 time-frequency diagram of LFP was performed using a short-time Fourier  
575 transform in overlapping 512 ms Hanning window with a step size of 50 ms  
576 (NFFT = 512).

### 577 **Surface electrocardiography (ECG)**

578 Once the righting reflex was lost after propofol injection, the mice were placed in  
579 the supine position on a rodent surgical monitor (Indus Instruments). The limbs of  
580 the mouse were closely attached to the electrode plate heating pad with  
581 conductive glue. Respiratory rate and peripheral oxygen saturation (SpO<sub>2</sub>) were  
582 measured for 2-3 minutes. Data between 60 sec to 120 sec after LORR were  
583 extracted every 10 sec by offline analysis.

### 584 **Histology**

585 Animals were deeply anesthetized with vaporized sevoflurane and transcardially  
586 perfused with 20 ml saline, followed by 20 ml paraformaldehyde (PFA, 4% in  
587 PBS). Brains were extracted and soaked in 4% PFA at 4°C for a minimum of 4  
588 hours and subsequently cryoprotected by transferring to a 30% sucrose solution  
589 (4°C, dissolved in PBS) until brains were saturated (for 36-48 hours). Coronal  
590 brain sections (40 µm) were cut using a freezing microtome (CM1950, Leica).  
591 The slices were collected and stored in PBS at 4°C until immunohistochemical  
592 processing.

593 The brain sections undergoing immunohistochemical staining were washed  
594 in PBS for 3 times (10 minutes each time) and incubated in a blocking solution  
595 containing 0.3% TritonX-100 and 5% normal donkey serum (Jackson  
596 ImmunoResearch, USA) in PBS for 1 hour at 37°C. Sections were then  
597 incubated (4°C, 24 hours) with primary antibodies anti-rabbit c-Fos (1:4000,  
598 ab190289, Abcam) dissolved in 1% normal donkey serum solution. Afterward,  
599 sections were washed in PBS for 4 times (15 minutes each time), then incubated  
600 with secondary antibodies Alexa Flour 488 conjugated donkey anti-rabbit IgG  
601 (1:800, Jackson) for 2 hours at room temperature. Nuclei were stained with DAPI  
602 (Beyotime, 1:10000) and washed three times with PBS. The photofluorograms  
603 were taken by the Leica DMI8 microscope. The photomicrographs were further  
604 processed by Fiji.

### 605 **Fiber photometry**

606 *In vivo* fiber photometry experiments were performed as previously described  
607 (*Zhu et al., 2020*). The AAV2/8-hSyn-GCaMP6s virus (200 nl,  $4 \times 10^{12}$  v.g./ml,  
608 S0225-8, Taitool Bioscience) was injected into the PVT nucleus (antero-  
609 posterior, AP, -1.34 mm, medio-lateral, ML, 0 mm, dorsal-ventral, DV, -2.9 mm)  
610 of the WT mice, the optic fiber was implanted above the PVT. After three weeks  
611 for virus expression, the mice were gently handled to be familiar with the calcium  
612 signal recording system (Thinker-Biotech). The LED intensity was 10-15 µW, and  
613 the fluorescence signal was recorded at 50 Hz. We defined a 2-minute time  
614 window before GE or corn oil injection as the baseline period. And we defined a

615 2-minute time window 10 minutes after GE or corn oil injection as the post-  
616 injection period.

### 617 **Brain slice electrophysiology**

618 P30 Mice were anesthetized with isoflurane and perfused transcardially with an  
619 ice-cold cutting solution containing (in mM): sucrose 213, KCl 2.5, NaH<sub>2</sub>PO<sub>4</sub> 1.25,  
620 MgSO<sub>4</sub> 10, CaCl<sub>2</sub> 0.5, NaHCO<sub>3</sub> 26, glucose 11 (300-305 mOsm). Then the brain  
621 was rapidly dissected, and coronal slices (280 μm) were sectioned. Slices were  
622 transferred into holding chamber and incubated in 34°C artificial cerebrospinal  
623 fluid (ACSF) containing (in mM): NaCl 126, KCl 2.5, NaH<sub>2</sub>PO<sub>4</sub> 1.25, MgCl<sub>2</sub> 2,  
624 CaCl<sub>2</sub> 2, NaHCO<sub>3</sub> 26, glucose 10 (300-305 mOsm). After 30 minutes of recovery,  
625 the holding chamber with the slices was transferred to room temperature (22-  
626 24°C). Both cutting solution and ACSF were continuously bubbled with 95%  
627 O<sub>2</sub>/5% CO<sub>2</sub>. Then, slices were placed on glass coverslips coated with poly-L-  
628 lysine and submerged in a recording chamber. All experiments were performed  
629 at near-physiological temperatures (30-32°C) using an in-line heater (Warner  
630 Instruments) while perfusing the recording chamber with ACSF at 3 ml/min using  
631 a pump (HL-1, Shanghai Huxi). Whole-cell patch-clamp recordings were made  
632 from the target neurons under IR-DIC visualization and a CCD camera (Retiga  
633 ELECTRO, QIMAGING) using a fluorescent Olympus BX51WI microscope.  
634 Recording pipettes (2-5 MΩ; Borosilicate Glass BF 150-86-10; Sutter Instrument)  
635 were prepared by a micropipette puller (model P97; Sutter Instrument) and  
636 backfilled with potassium-based internal solution containing (in mM) K-gluconate  
637 130, MgCl<sub>2</sub> 1, CaCl<sub>2</sub> 1, KCl 1, HEPES 10, EGTA 11, Mg-ATP 2, Na-GTP 0.3 (pH  
638 7.3, 290 mOsm) or cesium-based internal solution contained (in mM) CsMeSO<sub>3</sub>  
639 130, MgCl<sub>2</sub> 1, CaCl<sub>2</sub> 1, HEPES 10, QX-314 2, EGTA 11, Mg-ATP 2, Na-GTP 0.3  
640 (pH 7.3, 295 mOsm). Biocytin (0.2%) was included in the internal solution.

641 In dissecting the effect of GE on the firing rate activity of PVT neurons,  
642 neurons in PVT were recorded in I = 0 mode (potassium-based internal solution).  
643 After stable recording spontaneous firing for 2 to 3 minutes, 1 mM GE was bath

644 applied for 8 to 10 minutes. One-minute baseline and one-minute post-GE (8 or 9  
645 minutes after application of GE) were analyzed.

646 In dissecting the effect of GE on spontaneous excitatory currents (sEPSCs)  
647 or spontaneous inhibitory currents (sIPSCs) of PVT neurons, neurons in PVT  
648 were recorded in voltage-clamp mode (cesium-based internal solution, holding  
649 voltage -70 mV or 0 mV). After stable recording for 2 to 3 minutes, 0.1 mM, 0.3  
650 mM, or 1 mM GE was bath applied for 8 to 10 minutes. One-minute baseline and  
651 one-minute post-GE (8 or 9 minutes after application of GE) were analyzed.

652 In dissecting the effect of picrotoxin, gabazine, or bicuculline on GE-induced  
653 holding current at 0 mV, neurons in PVT were recorded in voltage-clamp mode  
654 (cesium-based internal solution, voltage clamp at 0 mV). After stable recording  
655 for 2 to 3 minutes, 50  $\mu$ M picrotoxin, 10  $\mu$ M gabazine, or 10  $\mu$ M bicuculline was  
656 bath applied for 5 to 8 minutes. Then 1 mM GE was bath applied together with  
657 different GABA receptor antagonists for 8 to 10 minutes. Different wash-out  
658 sequences were used according to the effect of GE on PVT neurons in the  
659 presence of different GABA receptor antagonists. For picrotoxin and bicuculline  
660 experiments, picrotoxin was first washed out, then GE was washed out. For the  
661 gabazine experiment, GE was first washed out, and then gabazine was washed  
662 out.

663 Picrotoxin was purchased from Tocris Bioscience (1128). Gabazine was  
664 purchased from MedChemExpress (HY-103533). Bicuculline methiodide was  
665 purchased from Abcam (ab120108). All other chemicals were obtained from  
666 Sigma.

### 667 **Electrophysiology data acquisition and analysis**

668 Data Acquisition and analysis were performed as described previously (Zhou et  
669 al., 2017). Voltage-clamp and current-clamp recordings were carried out using a  
670 computer-controlled amplifier (MultiClamp 700B; Molecular Devices). During  
671 recordings, traces were low-pass filtered at 4 kHz and digitized at 10 kHz  
672 (DigiData 1550B1, Molecular Devices). Data were acquired by Clampex 10.6.  
673 Data were filtered using a low-pass-Gaussian algorithm (-3 dB cutoff frequency =



674 1000 Hz) in Clampfit 10.6 (Molecular Devices). Extremely small, low signal-to-  
675 noise ratio and unreliable responses were regarded as no response. The  
676 frequency, amplitude, half-width of sEPSCs or sIPSCs were analyzed by event  
677 detection using self-defined templates in Clampfit 10.6.

### 678 **Homology modeling and molecular docking**

679 Homology modeling and molecular docking were performed as described  
680 previously (Wang et al., 2018). On account of the crystal structure of mouse  
681 GABA<sub>A</sub>R subunits that were not analyzed in RCSB Protein Data Bank (PDB), we  
682 downloaded the amino acid sequence of each GABA<sub>A</sub>R subunit from the  
683 UniProtKB database (<http://www.uniprot.org/>) to establish the protein crystal  
684 structure. Homology modeling was applied with the SWISS-MODEL  
685 (<https://www.swissmodel.expasy.org/>) to obtain the structure of each GABA<sub>A</sub>R  
686 subunit based on suited structure. PROCHECK was used to examine the  
687 stereochemical quality of the structure obtained from SWISS-MODEL to draw the  
688 Ramachandran plot. The interactions between GE and GABA<sub>A</sub>R subunits were  
689 simulated via AutoDocking vina. Default AutoDocking vina parameters were  
690 applied. Among these subunits, the interaction affinity between GE and  
691 GABA<sub>A</sub>Rβ3 activated pocket (Leu435) was the highest. Finally, the protein-ligand  
692 complexes were viewed by Pymol.

### 693 **Quantification and statistical analysis**

694 Software used for data analysis included: Clampfit 10.6, GraphPad Prism 6,  
695 MATLAB 2019, Fiji. Statistical detection methods include student's unpaired *t*-  
696 test, paired *t*-test, one-way or two-way ANOVA with *post hoc* Bonferroni test. A  
697 value of  $P < 0.05$  was considered as statistically significant, and data were shown  
698 as mean  $\pm$  SEM.

699

### 700 **Acknowledgment**

701 We thank Dr. Xing-Jun Liu (Shantou University Medical College, Shantou, China)  
702 for the valuable discussion. We thank Shuo Wang (Sixth People's Hospital,  
703 Shanghai Jiao Tong University) for the technical support. This work was

704 supported by the National Natural Science Foundation of China (No. 31900717,  
 705 81771202), the Shanghai Sailing Program (19YF1438700), Youth talent support  
 706 program from China Association for Science and Technology (2019QNRC001, to  
 707 D.M.), Youth talent support program from Shanghai Jiao Tong University School  
 708 of Medicine (19XJ11010, to D.M.), Innovative Research Team of High-level Local  
 709 University in Shanghai (to W.L. M.), Shanghai Key Laboratory of Acupuncture  
 710 Mechanism and Acupoint Function (to W.L. M.). We thank Enago  
 711 (<http://www.enago.com/>) for the English language review.

712

713

## Figures and legends

714

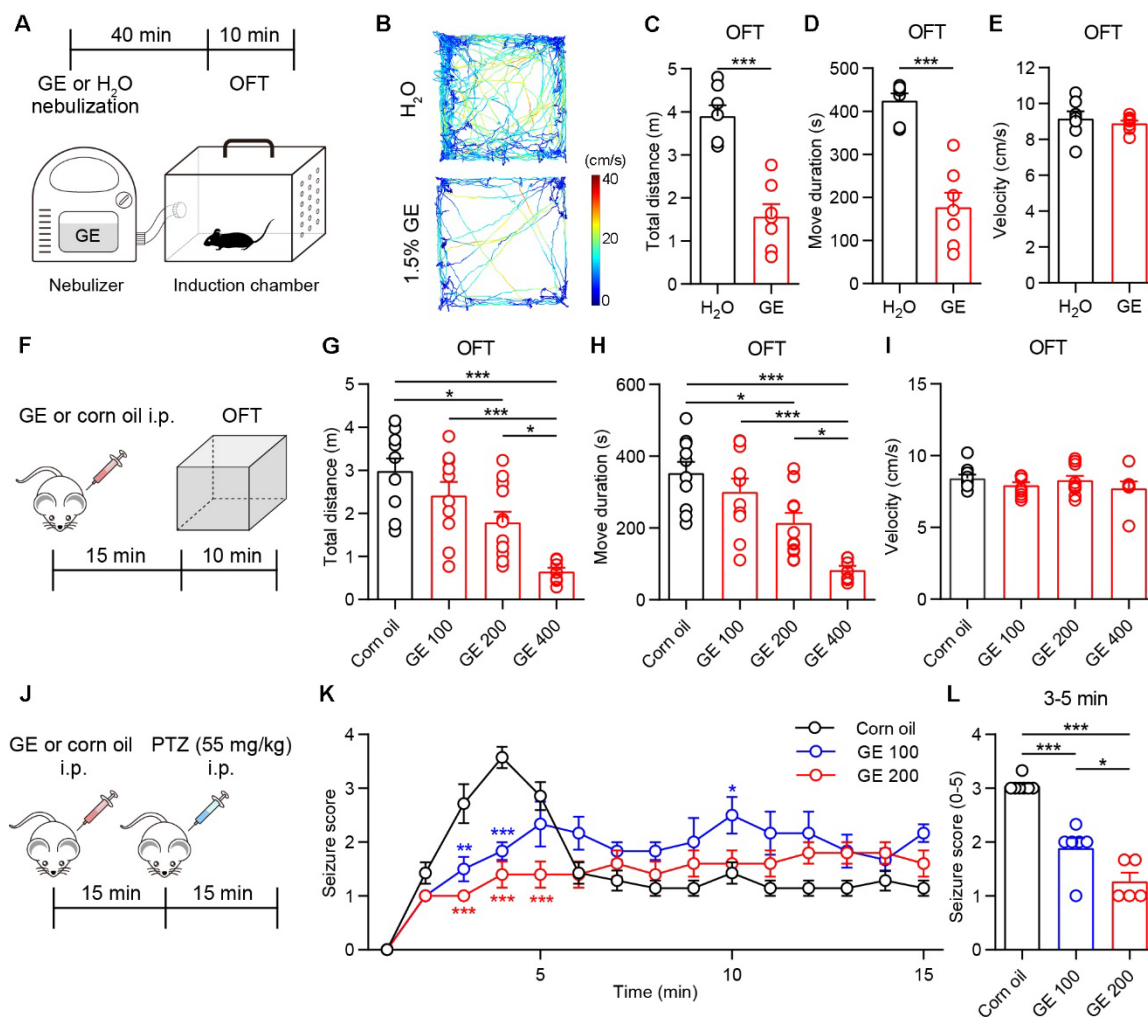

715

716 **Figure 1.** Geraniol reduces locomotion and relieves PTZ-induced seizures in  
717 mice. (A) Timeline for geraniol (GE) nebulization and open field test (OFT). (B)  
718 Representative moving tracks from an H<sub>2</sub>O nebulization mouse and a GE  
719 nebulization mouse. (C-E) The total distance (C), move duration (D), and velocity  
720 (E) in the open field test,  $n = 6$  mice. (F) Timeline for GE intraperitoneal injection  
721 and open field test. (G-I) The total distance (G), move duration (H), and velocity  
722 (I) in the open field test at doses of 100, 200, 400 mg/kg GE and corn oil,  $n = 7$ -  
723 12 mice. (J) Timeline for GE injection and PTZ (55 mg/kg)-induced seizures  
724 experiment. (K) Time course of mean scores of seizures induced by  
725 intraperitoneal injection of PTZ with GE or corn oil. Seizures symptoms were  
726 scored every 1 min for 15 min,  $n = 5$ -7 mice. (L) Quantification of mean score  
727 values for 3-5 min in each group. \* $p < 0.05$ , \*\* $p < 0.01$ , \*\*\* $p < 0.001$ . All data  
728 were represented as mean  $\pm$  SEM. Unpaired  $t$ -test for C, D. One-way ANOVA  
729 with Bonferroni post hoc test for G, H, K, and L.

730 The following figure supplements are available for figure 1:

731 **Video 1.** Intraperitoneal injection of GE and open field test. Mice were  
732 intraperitoneally injected with corn oil or GE (100, 200, 400 mg/kg). Fifteen  
733 minutes later, mice were tested in the OFT for 10 minutes. The video was played  
734 by 4x speed.

735 **Video 2.** Intraperitoneal injection of GE and PTZ-induced seizure test. Mice were  
736 intraperitoneally injected with corn oil or GE (200 mg/kg). Fifteen minutes later,  
737 mice were intraperitoneally injected with PTZ (55 mg/kg) and videotaped for 15  
738 minutes. The video showed the first 5 minutes after PTZ injection.

739

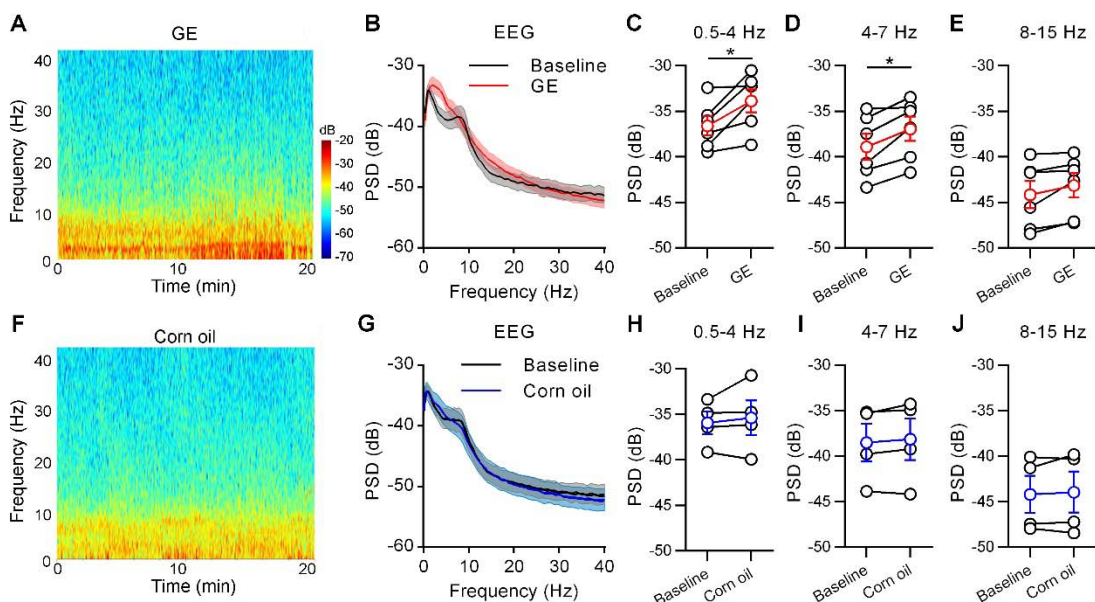

740

741 **Figure 2.** Geraniol alters the EEG in mice. (A) Representative power spectral  
742 density (PSD) of EEG data of a GE-injected mouse. Warm colors (red) represent  
743 higher power, while cool colors (blue) represent lower power. (B) Power spectra  
744 before and after GE injection,  $n = 6$  mice. (C-E) Quantification of the PSD for  
745 delta waves (0.5-4 Hz) (C), theta waves (4-7 Hz) (D), and alpha waves (8-15 Hz)  
746 (E). (F) Representative power spectral density of EEG data of a corn oil-injected  
747 mouse. (G) Power spectra before and after corn oil injection,  $n = 4$  mice. (H-J)  
748 Quantification of the PSD for delta (0.5-4 Hz) (H), theta (4-7 Hz) (I), and alpha  
749 (8–15Hz) (J). \* $p < 0.05$ . All data were represented as mean  $\pm$  SEM. Paired  $t$ -test  
750 for C and D.

751

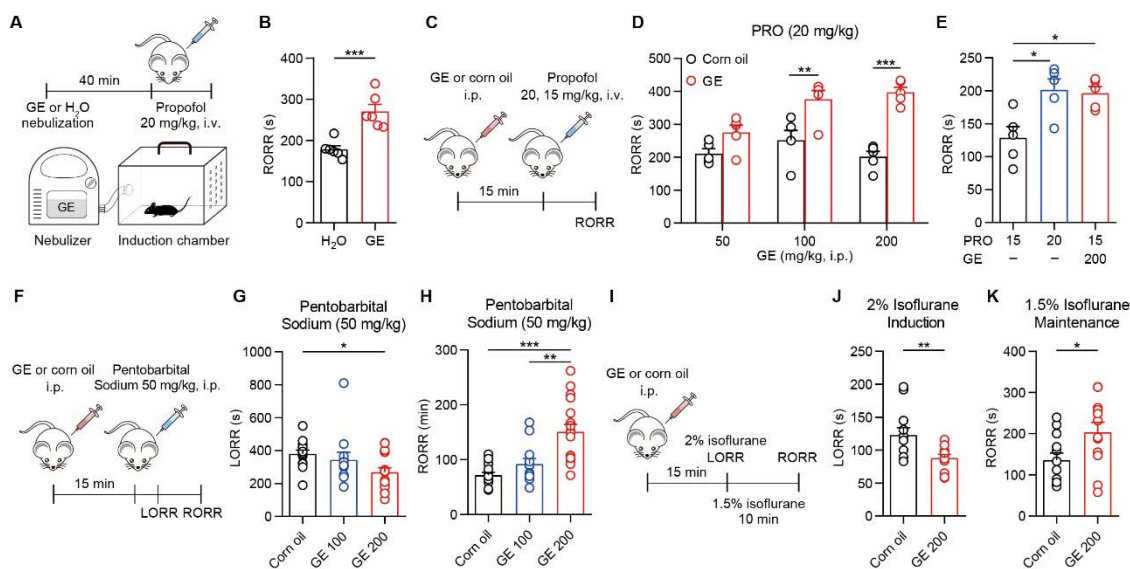

752

753 **Figure 3.** Geraniol facilitates general anesthesia. (A) Timeline for GE  
 754 nebulization and open field test. (B) RORR in propofol (20 mg/kg, i.v.)-induced  
 755 anaesthesia with GE nebulization (1.5% in ddH<sub>2</sub>O, 65 ml in 40 minutes), *n* = 6  
 756 mice. (C) Timeline for GE intraperitoneal injection and propofol-induced  
 757 anaesthesia experiment. (D) RORR in propofol (20 mg/kg, i.v.)-induced  
 758 anaesthesia with GE (50, 100, 200 mg/kg, i.p.), *n* = 5 mice. (E) RORR in 15  
 759 mg/kg propofol-induced anaesthesia, 20 mg/kg propofol-induced anaesthesia, and  
 760 15 mg/kg propofol combined with 200 mg/kg GE-induced anaesthesia. *n* = 5 mice.  
 761 (F) Timeline for GE intraperitoneal injection and pentobarbital sodium (50 mg/kg,  
 762 i.p.)-induced anaesthesia experiment. (G and H) LORR (G) and RORR (H) in  
 763 pentobarbital sodium-induced anaesthesia with GE (200 mg/kg, i.p.), *n* = 12-17  
 764 mice. (I) Timeline for GE intraperitoneal injection and isoflurane-induced  
 765 anaesthesia experiment. (J and K) LORR (J) and RORR (K) in 2% isoflurane-  
 766 induced anaesthesia with GE (200 mg/kg, i.p.), *n* = 12 mice. \**p* < 0.05, \*\**p* <  
 767 0.01, \*\*\**p* < 0.001. All data were presented as mean ± SEM. Unpaired *t*-test for  
 768 B, J, K. Two-way ANOVA with Bonferroni post hoc test for D. One-way ANOVA  
 769 with Bonferroni post hoc test for E, G, H.

770 The following figure supplement is available for figure 3:

771 **Figure supplement 1.** GE does not impair learning and memory in propofol-  
772 induced anesthesia of mice.

773

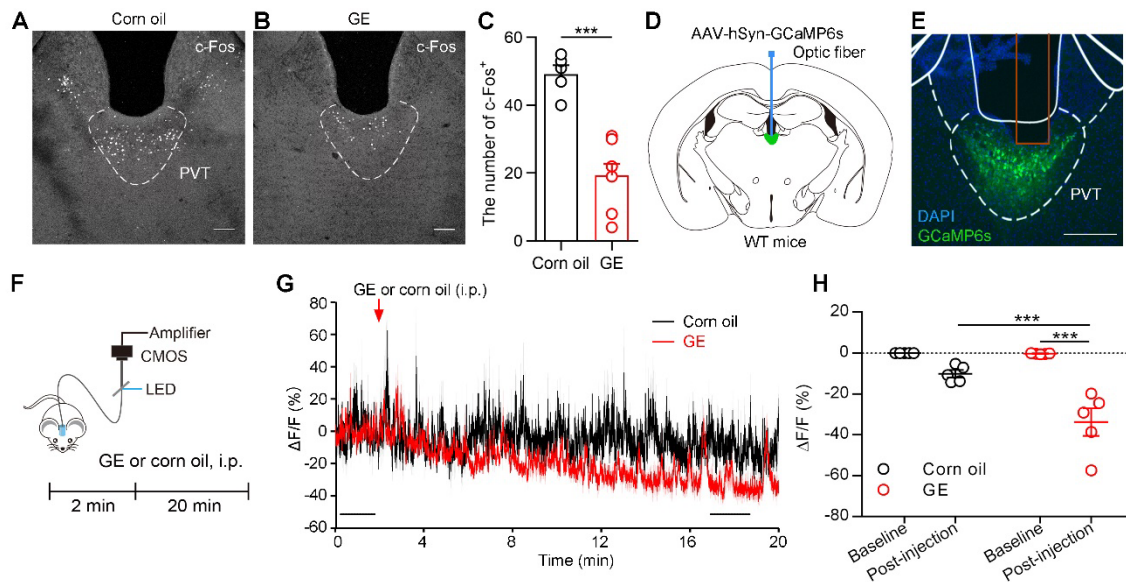

774

775 **Figure 4.** Geraniol suppresses the activity of the PVT. (A and B) The c-Fos  
776 expression in the PVT after corn oil (A) or GE injection (B). Scale bar: 100  $\mu$ m.  
777 (C) Quantification of the c-Fos<sup>+</sup> neurons in the PVT,  $n = 5-6$  mice. (D) The  
778 schematic for virus injection of AAV-hSyn-GCaMP6s into the PVT and placement  
779 of the optic fiber above the PVT. (E) The AAV-hSyn-GCaMP6s virus expression  
780 and the fiber track (red rectangle) in the PVT. Scale bar: 200  $\mu$ m. (F) Timeline for  
781 GE or corn oil intraperitoneal injection and calcium recording. (G) Averaged PVT  
782 calcium activities of GE-injected mice (red) and corn oil-injected mice (black).  
783 Two black bars represented the 2-minute baseline period and the 2-minute post-  
784 injection period (15 minutes after GE injection),  $n = 5$  mice. (H) Quantification of  
785 the fluorescence intensities in the baseline and post-injection period. \*\*\* $p <$   
786 0.001. All data were presented as mean  $\pm$  SEM. Unpaired  $t$ -test for C. Two-way  
787 ANOVA with Bonferroni post hoc test for H.

788

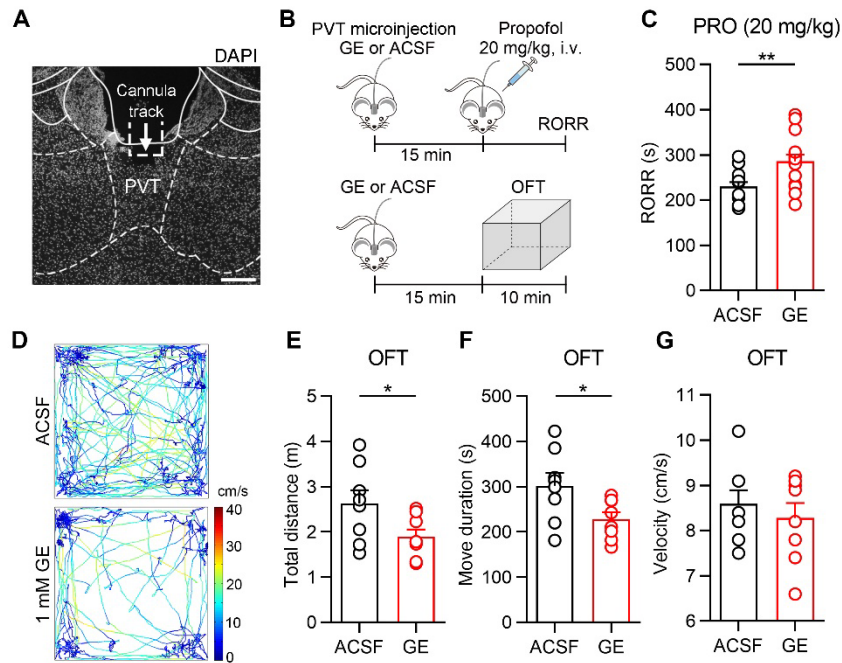

789

790 **Figure 5.** Microinjection of GE in PVT facilitates anesthesia and reduces  
791 locomotion. (A) Representative DAPI staining image from one mouse implanted  
792 with the cannula in the PVT. The arrow and dotted rectangle indicate the cannula  
793 track. Scale bar, 200  $\mu\text{m}$ . (B) Timelines for GE (1 mM, 200 nl) or ACSF  
794 microinjection in propofol-induced anesthesia experiment (top) and open field  
795 test (bottom). (C) Propofol-induced RORR in GE or ACSF microinjection  
796 experiments,  $n = 14-15$  mice. (D) Representative moving tracks from an ACSF  
797 (top) and a GE microinjected mouse (bottom). (E-G) Total distance (E), move  
798 duration (F), and velocity (G) in the open field test,  $n = 5$  mice. \* $p < 0.05$ ; \*\* $p <$   
799 0.01. All data were represented as mean  $\pm$  SEM. Unpaired  $t$ -test for C, E, F.

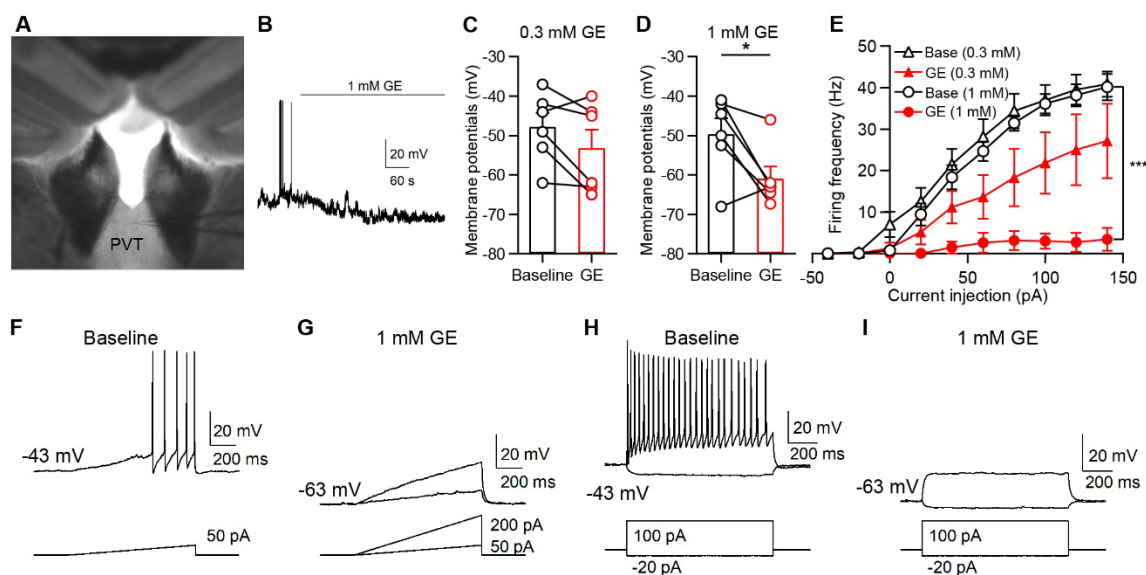

800

801 **Figure 6.** GE suppresses the activity of PVT neurons. (A) Bright field inverted  
802 microscope image of recording in PVT. (B) Whole-cell current-clamp recording  
803 (IC = 0 pA) of a representative PVT neuron with bath application of 1 mM GE. (C)  
804 The membrane potentials were hyperpolarized after application of 0.3 mM GE,  $n$   
805 = 6 neurons. (D) The membrane potentials were hyperpolarized after the  
806 application of 1 mM GE,  $n$  = 6 neurons. (E) Summary of data showing the effect  
807 of GE (0.3 mM and 1 mM) on step-current injection-evoked spike firings of PVT  
808 neurons,  $n$  = 6 neurons. (F and G) A representative neuron showed GE  
809 suppressed the spike firing in response to a depolarizing ramp-current injection.  
810 (H and I) The same representative neuron showed GE suppressed the spike  
811 firing in response to a depolarizing step-current injection. \* $p$  < 0.05; \*\*\* $p$  < 0.001.  
812 All data were represented as mean  $\pm$  SEM. Paired  $t$ -test for D. Two-way ANOVA  
813 with Bonferroni post hoc test for E.

814



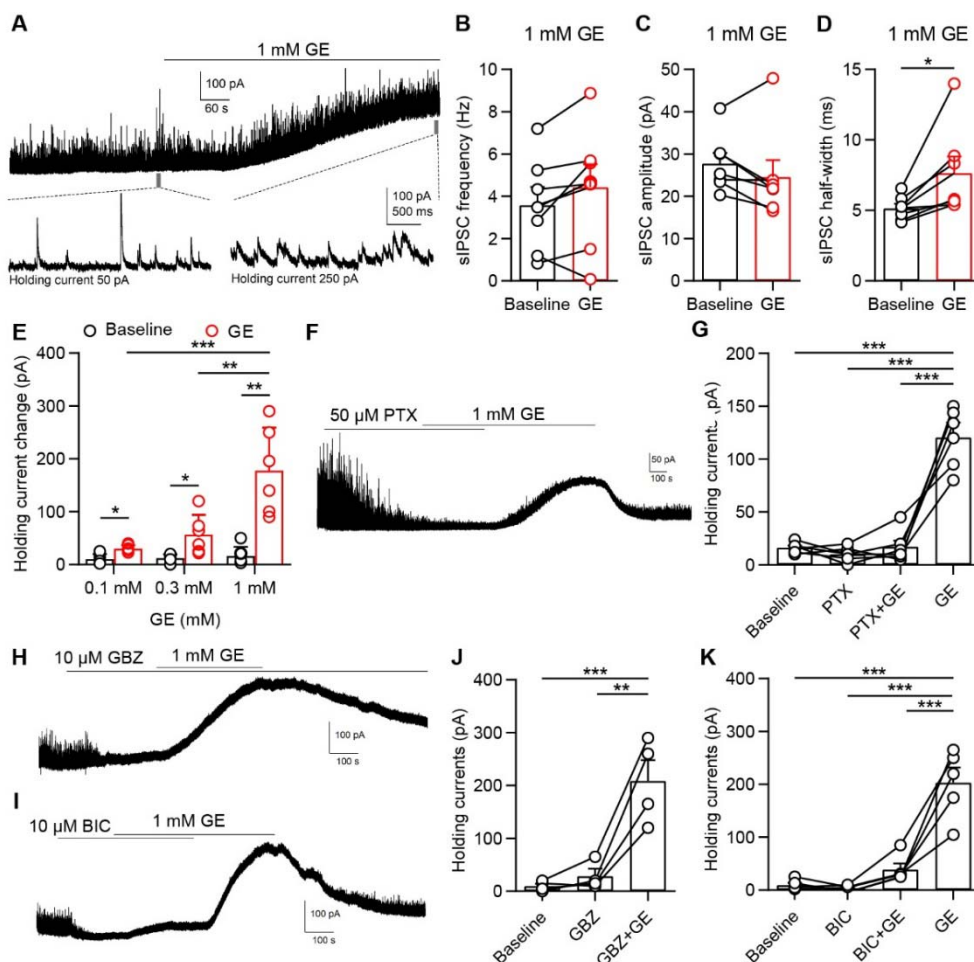

815

816 **Figure 7.** GE enhances inhibitory inputs to PVT neurons. (A) Whole-cell voltage-clamp recording (VC = 0 mV) of a representative PVT neuron. Top, bath application of 1 mM GE. Bottom, two 3-seconds time windows enlarged from  
 817 before and after application of 1 mM GE (indicated by gray bars in top panel). (B-  
 818 D) Frequency (B), amplitude (C), and half-width (D) of sIPSCs before and after 1  
 819 mM GE, *n* = 7 neurons. (E) Holding currents at 0 mV before and after 0.1 mM  
 820 GE, 0.3 mM GE and 1 mM GE, *n* = 6 neurons. (F) A representative neuron  
 821 showed picrotoxin (50 μM) blocked GE-induced tonic current in PVT neurons (VC  
 822 = 0 mV). (G) Statistical comparison of holding currents changes, *n* = 6 neurons.  
 823 (H) A representative neuron showed gabazine (GBZ, 10 μM) did not block GE-  
 824 induced tonic current in PVT neurons (VC = 0 mV). (I) A representative neuron  
 825  
 826

827 showed bicuculline (BIC, 10  $\mu$ M) blocked GE-induced tonic current in PVT  
828 neurons (VC = 0 mV). (J) Statistical comparison of holding currents changes in  
829 GBZ experiments,  $n = 4$  neurons. (K) Statistical comparison of holding currents  
830 changes in BIC experiments,  $n = 5$  neurons. \* $p < 0.05$ , \*\* $p < 0.01$ , \*\*\* $p < 0.001$ .  
831 All data were represented as mean  $\pm$  SEM. Paired t-test for D. Two-way ANOVA  
832 with Bonferroni post hoc test for E. One-way ANOVA with Bonferroni post hoc  
833 test for G, J, K.

834 The following figure supplement is available for figure 7:

835 **Figure supplement 1.** The effect of GE on sEPSCs, sIPSCs, and holding  
836 currents in PVT neurons.

837 **Figure supplement 2.** Molecular Docking of GE to GABA<sub>A</sub>R $\beta$ 3.

838

### 839 Supplemental Information

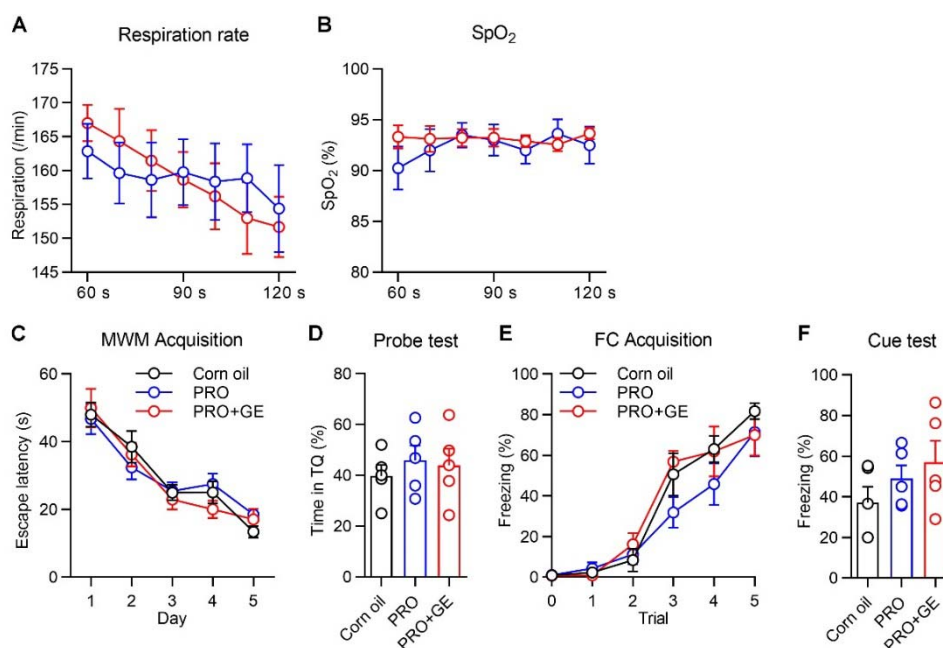

840

841 **Figure 3-figure supplement 1.** GE does not impair learning and memory in  
842 propofol-induced anesthesia of mice. (A and B) Respiratory rate (A) and oxygen  
843 saturation (B) of respiratory function before and after 1 mM GE,  $n = 8-9$  mice.  
844 (C) The escape latencies during acquisition in Morris water maze test on Day 1-  
845 5,  $n = 5$  mice. (D) Probe test on Day 6. (E) Percent of freezing during acquisition

846 in fear conditioning test on Day 1,  $n = 5$  mice. (F) Cue test on Day 2. All data  
847 were represented as mean  $\pm$  SEM.

848

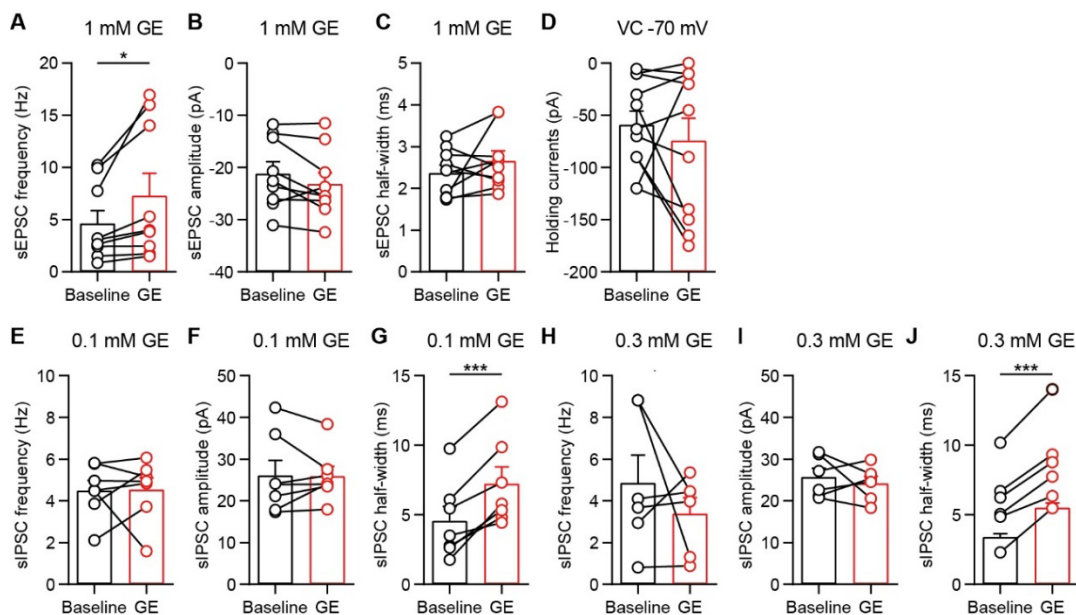

849

850 **Figure 7-figure supplement 1.** The effect of GE on sEPSCs, sIPSCs, and  
851 holding currents in PVT neurons. (A-C) Frequency (A), amplitude (B) and half-  
852 width (C) of sEPSCs before and after 1 mM GE,  $n = 9$  neurons. (D) Statistical  
853 comparison of 1 mM GE-induced holding currents changes (VC = -70 mV),  $n =$   
854 11 neurons. (E-G) Frequency (E), amplitude (F) and half-width (G) of sIPSCs  
855 before and after 0.1 mM GE,  $n = 7$  neurons. (H-J) Frequency (H), amplitude (I)  
856 and half-width (J) of sIPSCs before and after 0.3 mM GE,  $n = 6$  neurons. \*p <  
857 0.05, \*\*\*p < 0.001. All data were represented as mean  $\pm$  SEM. Paired  $t$ -test for A.

858

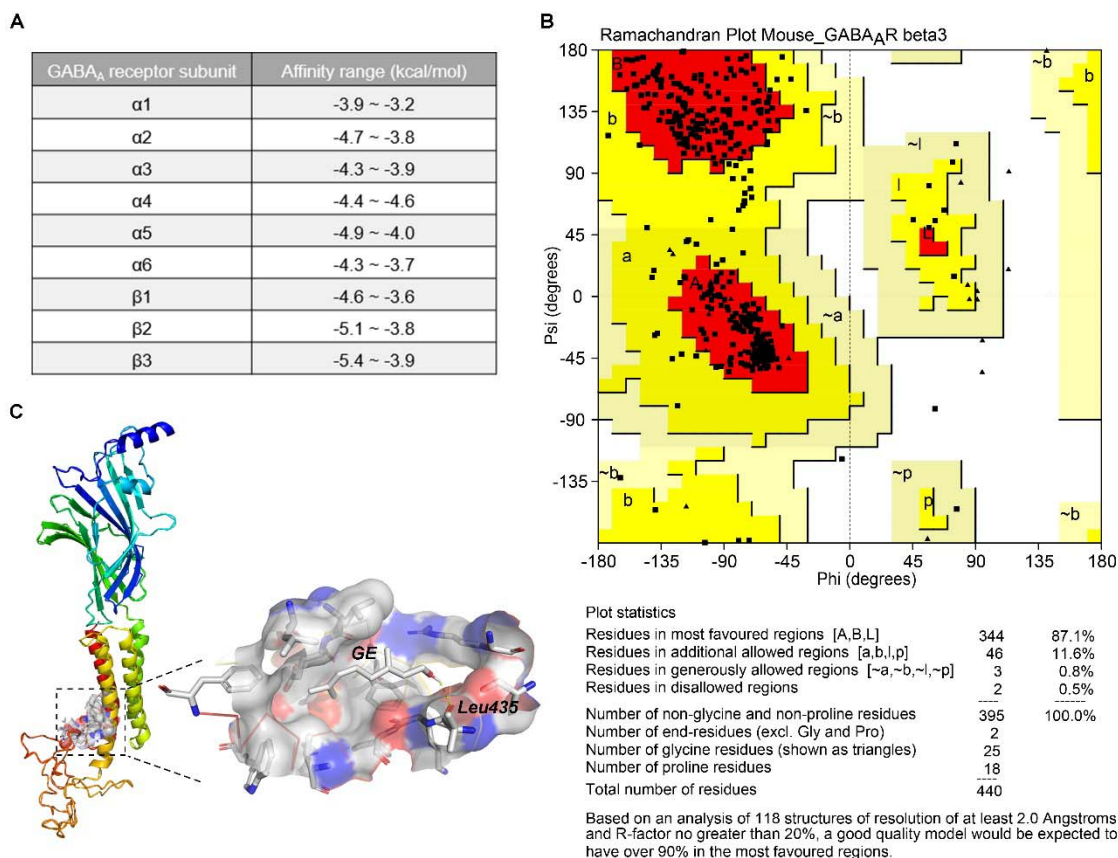

859

860 **Figure 7–figure supplement 2.** Molecular Docking of GE to GABA<sub>A</sub>Rβ3. (A) The  
 861 top binding affinity range of GE to GABA<sub>A</sub>R subunits was listed. Affinity  
 862 represents binding energy. (B) Ramachandran plot of mouse GABA<sub>A</sub>Rβ3. The  
 863 different color areas of the Ramachandran plot are shaded in core (Red), allow  
 864 (Yellow), generous (Light yellow), disallow (White). 87.1% of amino acid residues  
 865 are located in the core area; 11.6% amino acid residues are located in the  
 866 allowed area. (C) The binding sites of GE to GABA<sub>A</sub>Rβ3 were showed. GE  
 867 interacts with residues in hydrogen bondings towards Leu435.

868

869

870

## References

871 Bai D, Zhu G, Pennefather P, Jackson MF, Macdonald JF, Orser BA. 2001.  
 872 Distinct functional and pharmacological properties of tonic and quantal  
 873 inhibitory postsynaptic currents mediated by γ-aminobutyric acidA receptors

- 874 in hippocampal neurons. *Mol Pharmacol* **59**:814–824.  
875 doi:10.1124/mol.59.4.814
- 876 Betley JN, Cao ZFH, Ritola KD, Sternson SM. 2013. Parallel, redundant circuit  
877 organization for homeostatic control of feeding behavior. *Cell* **155**:1337–  
878 1350. doi:10.1016/j.cell.2013.11.002
- 879 Bowery NG. 2006. GABA<sub>B</sub> receptor: A site of therapeutic benefit. *Curr Opin*  
880 *Pharmacol* **6**:37–43. doi:10.1016/j.coph.2005.10.002
- 881 Brohan J, Goudra BG. 2017. The role of GABA receptor agonists in anesthesia  
882 and sedation. *CNS Drugs* **31**:845–856. doi:10.1007/s40263-017-0463-7
- 883 Brown EN, Pavone KJ, Naranjo M. 2018. Multimodal general anesthesia: Theory  
884 and practice. *Anesth Analg* **127**:1246–1258.  
885 doi:10.1213/ANE.0000000000003668
- 886 Can E, Kızak V, Can ŞS, Özçiçek E. 2019. Anesthetic efficiency of three  
887 medicinal plant oils for aquatic species: Coriander *Coriandrum sativum*,  
888 Linaloe Tree *Bursera delpechiana*, and Lavender *Lavandula hybrida*. *J*  
889 *Aquat Anim Health* **31**:266–273. doi:10.1002/aah.10081
- 890 Chalifoux JR, Carter AG. 2011. GABA<sub>B</sub> receptor modulation of synaptic function.  
891 *Curr Opin Neurobiol* **21**:339–344. doi:10.1016/j.conb.2011.02.004
- 892 Chen W, Viljoen AM. 2010. Geraniol — A review of a commercially important  
893 fragrance material. *South African J Bot* **76**:643–651.  
894 doi:10.1016/j.sajb.2010.05.008
- 895 Cho M, So I, Chun JN, Jeon JH. 2016. The antitumor effects of geraniol:  
896 Modulation of cancer hallmark pathways (Review). *Int J Oncol* **48**:1772–  
897 1782. doi:10.3892/ijo.2016.3427
- 898 Coté CJ, Wilson S. 2019. Guidelines for monitoring and management of pediatric  
899 patients before, during, and after sedation for diagnostic and therapeutic  
900 procedures. *Pediatrics* **143**. doi:10.1542/peds.2019-1000
- 901 de Menezes-Filho JER, Gondim ANS, Cruz JS, de Souza AA, dos Santos JNA,  
902 Conde-Garcia EA, de Sousa DP, Santos MS, de Oliveira ED, de  
903 Vasconcelos CML. 2014. Geraniol blocks calcium and potassium channels

- 904 in the mammalian myocardium: useful effects to treat arrhythmias. *Basic Clin*  
905 *Pharmacol Toxicol* **115**:534–544. doi:10.1111/bcpt.12274
- 906 Dean G, Jacobs AR, Goldstein RC, Gevirtz CM, Paul ME. 2011. The safety of  
907 deep sedation without intubation for abortion in the outpatient setting. *J Clin*  
908 *Anesth* **23**:437–442. doi:10.1016/j.jclinane.2011.05.001
- 909 Drexler B, Balk M, Antkowiak B. 2016. Synergistic modulation of  $\gamma$ -aminobutyric  
910 acid type A receptor-mediated synaptic inhibition in cortical networks by  
911 allopregnanolone and propofol. *Anesth Analg* **123**:877–883.  
912 doi:10.1213/ANE.0000000000001429
- 913 Dureau V, Laustela S, Barth L, Gianolini F, Vogt KE, Keist R, Chandra D,  
914 Homanics GE, Rudolph U, Fritschy JM. 2011. Spatiotemporal specificity of  
915 GABA<sub>A</sub> receptor-mediated regulation of adult hippocampal neurogenesis.  
916 *Eur J Neurosci* **34**:362–373. doi:10.1111/j.1460-9568.2011.07782.x
- 917 El-Bassossy HM, Elberry AA, Ghareib SA. 2016. Geraniol improves the impaired  
918 vascular reactivity in diabetes and metabolic syndrome through calcium  
919 channel blocking effect. *J Diabetes Complications* **30**:1008–1016.  
920 doi:10.1016/j.jdiacomp.2016.04.006
- 921 Frangaj A, Fan QR. 2018. Structural biology of GABA<sub>B</sub> receptor.  
922 *Neuropharmacology* **136**:68–79. doi:10.1016/j.neuropharm.2017.10.011
- 923 Franks NP. 2008. General anaesthesia: From molecular targets to neuronal  
924 pathways of sleep and arousal. *Nat Rev Neurosci* **9**:370–386.  
925 doi:10.1038/nrn2372
- 926 Garlet QI, Pires L da C, Milanesi LH, Marafija JR, Baldisserotto B, Mello CF,  
927 Heinzmann BM. 2017. (+)-Dehydrofukinone modulates membrane potential  
928 and delays seizure onset by GABA<sub>A</sub> receptor-mediated mechanism in mice.  
929 *Toxicol Appl Pharmacol* **332**:52–63. doi:10.1016/j.taap.2017.07.010
- 930 Gaston TE, Szaflarski JP. 2018. Cannabis for the treatment of epilepsy: an  
931 update. *Curr Neurol Neurosci Rep* **18**. doi:10.1007/s11910-018-0882-y

- 932 Ge S, Goh ELK, Sailor KA, Kitabatake Y, Ming GL, Song H. 2006. GABA  
933 regulates synaptic integration of newly generated neurons in the adult brain.  
934 *Nature* **439**:589–593. doi:10.1038/nature04404
- 935 Huang RQ, Bell-Horner CL, Dibas MI, Covey DF, Drewe JA, Dillon GH. 2001.  
936 Pentylentetrazole-induced inhibition of recombinant  $\gamma$ -aminobutyric acid  
937 type A (GABA<sub>A</sub>) receptors: Mechanism and site of action. *J Pharmacol Exp*  
938 *Ther* **298**:986–995.
- 939 Jing W, Wang Y, Fang G, Chen M, Xue M, Guo D, Yao D, Xia Y. 2016. EEG  
940 bands of wakeful rest, slow-wave and rapid-eye-movement sleep at different  
941 brain areas in rats. *Front Comput Neurosci* **10**:1–13.  
942 doi:10.3389/fncom.2016.00079
- 943 Khan AQ, Khan R, Qamar W, Lateef A, Rehman MU, Tahir M, Ali F, Hamiza OO,  
944 Hasan SK, Sultana S. 2013. Geraniol attenuates 12-O-tetradecanoylphorbol-  
945 13-acetate (TPA)-induced oxidative stress and inflammation in mouse skin:  
946 Possible role of p38 MAP Kinase and NF- $\kappa$ B. *Exp Mol Pathol* **94**:419–429.  
947 doi:10.1016/j.yexmp.2013.01.006
- 948 Kim JJ, Gharpure A, Teng J, Zhuang Y, Howard RJ, Zhu S, Noviello CM, Walsh  
949 RM, Lindahl E, Hibbs RE. 2020. Shared structural mechanisms of general  
950 anaesthetics and benzodiazepines. *Nature* **585**:303–308.  
951 doi:10.1038/s41586-020-2654-5
- 952 La Rocca V, da Fonsêca DV, Silva-Alves KS, Ferreira-da-Silva FW, de Sousa  
953 DP, Santos PL, Quintans-Júnior LJ, Leal-Cardoso JH, de Almeida RN. 2017.  
954 Geraniol induces antinociceptive effect in mice evaluated in behavioural and  
955 electrophysiological models. *Basic Clin Pharmacol Toxicol* **120**:22–29.  
956 doi:10.1111/bcpt.12630
- 957 Lapczynski A, Bhatia SP, Foxenberg RJ, Letizia CS, Api AM. 2008. Fragrance  
958 material review on geraniol. *Food Chem Toxicol* **46**:160–170.  
959 doi:10.1016/j.fct.2008.06.048

- 960 Lee JH, Latchoumane CF V., Park J, Kim J, Jeong J, Lee KH, Shin HS. 2019.  
961 The rostroventral part of the thalamic reticular nucleus modulates fear  
962 extinction. *Nat Commun* **10**:1–12. doi:10.1038/s41467-019-12496-9
- 963 Li KX, Lu YM, Xu ZH, Zhang J, Zhu JM, Zhang JM, Cao SX, Chen XJ, Chen Z,  
964 Luo JH, Duan S, Li XM. 2012. Neuregulin 1 regulates excitability of fast-  
965 spiking neurons through Kv1.1 and acts in epilepsy. *Nat Neurosci* **15**:267–  
966 273. doi:10.1038/nn.3006
- 967 Linck V de M, da Silva AL, Figueiró M, Luis Piato Â, Paula Herrmann A, Dupont  
968 Birck F, Bastos Caramão E, Sávio Nunes D, Moreno PRH, Elisabetsky E.  
969 2009. Inhaled linalool-induced sedation in mice. *Phytomedicine* **16**:303–307.  
970 doi:10.1016/j.phymed.2008.08.001
- 971 Lv Y, Zhang L, Li N, Mai N, Zhang Y, Pan S. 2017. Geraniol promotes functional  
972 recovery and attenuates neuropathic pain in rats with spinal cord injury. *Can*  
973 *J Physiol Pharmacol* **95**:1389–1395. doi:10.1139/cjpp-2016-0528
- 974 Maeda A, Katafuchi T, Oba Y, Shiokawa H, Yoshimura M. 2010. Enhancement of  
975 GABAergic tonic currents by midazolam and noradrenaline in rat substantia  
976 gelatinosa neurons in vitro. *Anesthesiology* **113**:429–437.  
977 doi:10.1097/ALN.0b013e3181e19bd4
- 978 Martin LJ, Zurek AA, MacDonald JF, Roder JC, Jackson MF, Orser BA. 2010.  
979  $\alpha$ 5GABA<sub>A</sub> receptor activity sets the threshold for long-term potentiation and  
980 constrains hippocampus-dependent memory. *J Neurosci* **30**:5269–5282.  
981 doi:10.1523/JNEUROSCI.4209-09.2010
- 982 Masiulis S, Desai R, Uchański T, Serna Martin I, Laverty D, Karia D, Malinauskas  
983 T, Zivanov J, Pardon E, Kotecha A, Steyaert J, Miller KW, Aricescu AR.  
984 2019. GABA<sub>A</sub> receptor signalling mechanisms revealed by structural  
985 pharmacology. *Nature* **565**:454–459. doi:10.1038/s41586-018-0832-5
- 986 McOmish CE, Lira A, Hanks JB, Gingrich JA. 2012. Clozapine-induced locomotor  
987 suppression is mediated by 5-HT<sub>2A</sub> receptors in the forebrain.  
988 *Neuropsychopharmacology* **37**:2747–2755. doi:10.1038/npp.2012.139



- 989 Medeiros KAAL, dos Santos JR, Melo TC de S, de Souza MF, Santos L de G, de  
990 Gois AM, Cintra RR, Lins LCRF, Ribeiro AM, Marchioro M. 2018.  
991 Depressant effect of geraniol on the central nervous system of rats: Behavior  
992 and ECoG power spectra. *Biomed J* **41**:298–305.  
993 doi:10.1016/j.bj.2018.08.008
- 994 O'Neill N, Sylantyev S. 2018. Spontaneously opening GABA<sub>A</sub> receptors play a  
995 significant role in neuronal signal filtering and integration. *Cell Death Dis*  
996 **9**:813. doi:10.1038/s41419-018-0856-7
- 997 Orser BA, Wang LY, Pennefather PS, MacDonald JF. 1994. Propofol modulates  
998 activation and desensitization of GABA<sub>(A)</sub> receptors in cultured murine  
999 hippocampal neurons. *J Neurosci* **14**:7747–7760. doi:10.1523/jneurosci.14-  
1000 12-07747.1994
- 1001 Pavan B, Dalpiaz A, Marani L, Beggiato S, Ferraro L, Canistro D, Paolini M,  
1002 Vivarelli F, Valerii MC, Comparone A, De Fazio LD, Spisni E. 2018. Geraniol  
1003 pharmacokinetics, bioavailability and its multiple effects on the liver  
1004 antioxidant and xenobiotic-metabolizing enzymes. *Front Pharmacol* **9**:1–14.  
1005 doi:10.3389/fphar.2018.00018
- 1006 Pavlov I, Savtchenko LP, Kullmann DM, Semyanov A, Walker MC. 2009.  
1007 Outwardly rectifying tonically active GABA<sub>A</sub> receptors in pyramidal cells  
1008 modulate neuronal offset, not gain. *J Neurosci* **29**:15341–15350.  
1009 doi:10.1523/JNEUROSCI.2747-09.2009
- 1010 Ralvenius WT, Acuña MA, Benke D, Matthey A, Daali Y, Rudolph U, Desmeules  
1011 J, Zeilhofer HU, Besson M. 2016. The clobazam metabolite N-desmethyl  
1012 clobazam is an  $\alpha$ 2 preferring benzodiazepine with an improved therapeutic  
1013 window for antihyperalgesia. *Neuropharmacology* **109**:366–375.  
1014 doi:10.1016/j.neuropharm.2016.07.004
- 1015 Reade MC, Finfer S. 2014. Sedation and delirium in the intensive care unit. *N*  
1016 *Engl J Med* **370**:444–54. doi:10.1056/NEJMra1208705
- 1017 Rekha KR, Selvakumar GP, Sethupathy S, Santha K, Sivakamasundari RI. 2013.  
1018 Geraniol ameliorates the motor behavior and neurotrophic factors

- 1019 inadequacy in MPTP-induced mice model of parkinson's disease. *J Mol*  
1020 *Neurosci* **51**:851–862. doi:10.1007/s12031-013-0074-9
- 1021 Ren S, Wang Yaling, Yue F, Cheng X, Dang R, Qiao Q, Sun X, Li X, Jiang Q,  
1022 Yao J, Qin H, Wang G, Liao X, Gao D, Xia J, Zhang J, Hu B, Yan J, Wang  
1023 Yanjiang, Xu M, Han Y, Tang X, Chen X, He C, Hu Z. 2018. The  
1024 paraventricular thalamus is a critical thalamic area for wakefulness. *Science*  
1025 **362**:429–434. doi:10.1126/science.aat2512
- 1026 Scammell TE, Arrigoni E, Lipton JO. 2017. Neural circuitry of wakefulness and  
1027 sleep. *Neuron* **93**:747–765. doi:10.1016/j.neuron.2017.01.014
- 1028 Shi MM, Piao JH, Xu XL, Zhu L, Yang L, Lin FL, Chen J, Jiang JG. 2016.  
1029 Chinese medicines with sedative-hypnotic effects and their active  
1030 components. *Sleep Med Rev* **29**:108–118. doi:10.1016/j.smrv.2015.10.001
- 1031 Shoji H, Takao K, Hattori S, Miyakawa T. 2014. Contextual and cued fear  
1032 conditioning test using a video analyzing system in mice. *J Vis Exp* 1–13.  
1033 doi:10.3791/50871
- 1034 Takahashi H, Katayama KI, Sohya K, Miyamoto H, Prasad T, Matsumoto Y, Ota  
1035 M, Yasuda H, Tsumoto T, Aruga J, Craig AM. 2012. Selective control of  
1036 inhibitory synapse development by Slitrk3-PTPδ trans-synaptic interaction.  
1037 *Nat Neurosci* **15**:389–398. doi:10.1038/nn.3040
- 1038 Thapa D, Losa R, Zweifel B, John Wallace R. 2012. Sensitivity of pathogenic and  
1039 commensal bacteria from the human colon to essential oils. *Microbiology*  
1040 **158**:2870–2877. doi:10.1099/mic.0.061127-0
- 1041 Ueno-Iio T, Shibakura M, Yokota K, Aoe M, Hyoda T, Shinohata R, Kanehiro A,  
1042 Tanimoto M, Kataoka M. 2014. Lavender essential oil inhalation suppresses  
1043 allergic airway inflammation and mucous cell hyperplasia in a murine model  
1044 of asthma. *Life Sci* **108**:109–115. doi:10.1016/j.lfs.2014.05.018
- 1045 Ueno S, Bracamontes J, Zorumski C, Weiss DS, Steinbach JH. 1997. Bicuculline  
1046 and gabazine are allosteric inhibitors of channel opening of the GABA<sub>(A)</sub>  
1047 receptor. *J Neurosci* **17**:625–634. doi:10.1523/jneurosci.17-02-00625.1997

- 1048 Van Erum J, Van Dam D, De Deyn PP. 2019. PTZ-induced seizures in mice  
1049 require a revised Racine scale. *Epilepsy Behav* **95**:51–55.  
1050 doi:10.1016/j.yebeh.2019.02.029
- 1051 Vorhees C V., Williams MT. 2006. Morris water maze: Procedures for assessing  
1052 spatial and related forms of learning and memory. *Nat Protoc* **1**:848–858.  
1053 doi:10.1038/nprot.2006.116
- 1054 Wang S, Liu C, Gong C, Li T, Zhao J, Xiao W, Liu Y, Peng S, Xiong C, Wang R,  
1055 Ding L, Liu X, Liang S, Xu H. 2018. Alpha linolenic acid intake alleviates  
1056 myocardial ischemia/reperfusion injury via the P2X7R/NF- $\kappa$ B signalling  
1057 pathway. *J Funct Foods* **49**:1–11. doi:10.1016/j.jff.2018.08.012
- 1058 Wlodarczyk AI, Sylantyev S, Herd MB, Kersanté F, Lambert JJ, Rusakov DA,  
1059 Linthorst ACE, Semyanov A, Belelli D, Pavlov I, Walker MC. 2013. GABA-  
1060 independent GABA<sub>A</sub> receptor openings maintain tonic currents. *J Neurosci*  
1061 **33**:3905–3914. doi:10.1523/JNEUROSCI.4193-12.2013
- 1062 Yamada J, Furukawa T, Ueno S, Yamamoto S, Fukuda A. 2007. Molecular basis  
1063 for the GABA<sub>A</sub> receptor-mediated tonic inhibition in rat somatosensory  
1064 cortex. *Cereb Cortex* **17**:1782–1787. doi:10.1093/cercor/bhl087
- 1065 Ye C-J, Li S-A, Zhang Y, Lee W-H. 2019. Geraniol targets KV1.3 ion channel and  
1066 exhibits anti-inflammatory activity in vitro and in vivo. *Fitoterapia*  
1067 **139**:104394. doi:10.1016/j.fitote.2019.104394
- 1068 Zhang X, Van Den Pol AN. 2017. Rapid binge-like eating and body weight gain  
1069 driven by zona incerta GABA neuron activation. *Science* **356**:853–859.  
1070 doi:10.1126/science.aam7100
- 1071 Zhang YF, Huang Y, Ni YH, Xu ZM. 2019. Systematic elucidation of the  
1072 mechanism of geraniol via network pharmacology. *Drug Des Devel Ther*  
1073 **13**:1069–1075. doi:10.2147/DDDT.S189088
- 1074 Zhou L, Liu MZ, Li Q, Deng J, Mu D, Sun YG. 2017. Organization of functional  
1075 long-range circuits controlling the activity of serotonergic neurons in the  
1076 dorsal raphe nucleus. *Cell Rep* **18**:3018–3032.  
1077 doi:10.1016/j.celrep.2017.02.077
